# Supplementary material for: Inorganic–organic hybrid silica based tin complex as a novel, highly efficient and recyclable heterogeneous catalyst for the one-pot preparation of spirooxindoles in water
Source: Royal Society of Chemistry journal article supplement (doi:10.1039/c4dt02038c), 2014-01-01

## Novel inorganic-organic hybrid silica based tin complex as a novel, highly efficient and recyclable heterogeneous catalyst and its application for the one-pot preparation of spirooxindoles in water

R. Ghahremanzadeh,<sup>a</sup> Z. Rashid,<sup>b</sup> A-H. Zarnani,<sup>c</sup> and H. Naeimi<sup>b\*</sup>

<sup>a</sup>Nanobiotechnology Research Center, Avicenna Research Institute, (ACECR), Tehran, Iran.

<sup>b</sup>Department of Organic Chemistry, Faculty of Chemistry, University of Kashan, Kashan, 87317, I.R. Iran.

<sup>c</sup>Reproductive Immunology Research Center, Avicenna Research Institute, (ACECR), Tehran, Iran.

E-mail: [Naeimi@kashanu.ac.ir](mailto:Naeimi@kashanu.ac.ir)

### SUPPORTING INFORMATION

| <i>List of contents</i>                   | <i>Page</i> | <i>List of contents</i>   | <i>Page</i> |
|-------------------------------------------|-------------|---------------------------|-------------|
| Title, author's name, address             | <b>1</b>    | <sup>13</sup> C NMR of 4l | <b>25</b>   |
| General methods and characterization data | <b>2-11</b> | <sup>1</sup> H NMR of 4n  | <b>26</b>   |
| <sup>1</sup> H NMR of 4e                  | <b>12</b>   | <sup>13</sup> C NMR of 4n | <b>27</b>   |
| <sup>13</sup> C NMR of 4e                 | <b>13</b>   | <sup>1</sup> H NMR of 4o  | <b>28</b>   |
| <sup>1</sup> H NMR of 4f                  | <b>14</b>   | <sup>13</sup> C NMR of 4o | <b>29</b>   |
| <sup>13</sup> C NMR of 4f                 | <b>15</b>   |                           |             |
| <sup>1</sup> H NMR of 4g                  | <b>16</b>   |                           |             |
| <sup>13</sup> C NMR of 4g                 | <b>17</b>   |                           |             |
| <sup>1</sup> H NMR of 4i                  | <b>18</b>   |                           |             |
| <sup>13</sup> C NMR of 4i                 | <b>19</b>   |                           |             |
| <sup>1</sup> H NMR of 4j                  | <b>20</b>   |                           |             |
| <sup>13</sup> C NMR of 4j                 | <b>21</b>   |                           |             |
| <sup>1</sup> H NMR of 4k                  | <b>22</b>   |                           |             |
| <sup>13</sup> C NMR of 4k                 | <b>23</b>   |                           |             |
| <sup>1</sup> H NMR of 4l                  | <b>24</b>   |                           |             |

## Experimental Part

**General.** The chemicals used in this work were obtained from Fluka, Merck, and Aldrich was used without purification. Melting points were measured on an Electrothermal 9200 apparatus. IR spectra were recorded as KBr pellets on a Perkin-Elmer 781 spectrophotometer and an Impact 400 Nicolet FT-IR spectrophotometer.  $^1\text{H}$  and  $^{13}\text{C}$  NMR spectra were recorded on a BRUKER DRX-300 AVANCE spectrometer at 300.13 and 75.47 MHz.  $^1\text{H}$  and  $^{13}\text{C}$  NMR spectra were obtained on solutions in  $\text{DMSO-}d_6$  solvent using tetramethylsilane as internal reference. The elemental analyses (C.H.N) were obtained from a Carlo ERBA Model EA 1108 analyzer. The content of tin in the heterogenized catalyst was determined by VISTA-PRO, CCD simultaneous ICP analyser. Thermogravimetric/differential thermal analyses (TG/DTA) was performed on a Thermal Analyzer with a heating rate of  $20\text{ }^\circ\text{C min}^{-1}$  over a temperature range of  $25\text{--}1100\text{ }^\circ\text{C}$  under flowing compressed  $\text{N}_2$ . The purity determination of the substrates and reaction monitoring were accomplished by TLC on silica-gel polygram SILG/UV 254 plates (from Merck Company).

## Catalyst preparation

### Typical experimental procedure for the preparation of catalyst

#### a) Activation of silica gel (SG):

Silica gel (Aldrich 70–270 mesh,  $60\text{ \AA}$ , Surface area  $> 500\text{ m}^2/\text{G}$ ) was activated by treatment with HCl (5 M) and dried in vacuum at  $120\text{ }^\circ\text{C}$ .

#### b) Preparation of the amino-functionalized silica gel (SG-NH<sub>2</sub>):

Activated silica gel (1g) was added to a solution of APTES (1.8 g, 1.9 ml) in dry toluene (50 ml) and refluxed for 24h under  $\text{N}_2$  atmosphere. The white solid was filtered and washed repeatedly with ethanol and finally dried at  $50\text{ }^\circ\text{C}$  under vacuum.

#### c) Grafting of 2-amino benzamide through isatoic anhydride on functionalized silica gel (SG-NH<sub>2</sub>-2AB):

The amino-functionalized silica gel (1 g) was added to the solution of isatoic anhydride (8 mmol, 1.3 g) in ethanol (25 ml) and refluxed for 24h. The resulting

solid was collected by filtration, repeatedly washed with ethanol to remove unreacted isatoic anhydride. It was dried under vacuum at 50 °C.

**d) Synthesis of tin catalyst immobilized on silica gel (SG-NH<sub>2</sub>-2AB-Sn):**

The catalyst was prepared by stirring a mixture of 2-amino benzamide on functionalized silica gel (SG-NH<sub>2</sub>-2AB) (1 g) and tin chloride (8 mmol) in ethanol (50 ml) at reflux for 24h. After that, the catalyst was filtered, washed several times with ethanol, and dried under vacuum at 50 °C

**Typical Procedure for Preparation of 3'-phenyl-spiro[indoline-3,4'-pyrazolo[4',3':5,6]pyrido[2,3 d]pyrimidine]- 2,5',7'(6'H,8'H,9'H)-trione (4e):**

A mixture of 1,3-diphenyl-1*H*-pyrazol-5-amine (0.24 g, 1 mmol), barbituric acid (0.13 g, 1 mmol), isatine (0.15 g, 1 mmol), and SG-NH<sub>2</sub>-2AB-Sn as a catalyst (10 mol%) under refluxing water (5 mL) was stirred (the progress of the reaction was monitored by TLC). After completion of the reaction (TLC), the solution was cooled to room temperature, then the precipitated product was filtered and washed with water (10 mL) and ethanol (5 mL), dried to afford the crude product. The crude precipitate dissolved in DMF and again filtered for catalyst separation, and finally water was added into solution and the product was extracted and recrystallized by EtOH to afford the pure product.

**3'-Phenyl-spiro[indoline-3,4'-pyrazolo[4',3':5,6]pyrido[2,3 d]pyrimidine]- 2,5',7'(6'H,8'H,9'H)-trione (4a):**

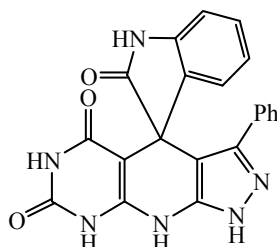

White powder (83%); MP >300 °C. IR (KBr) ( $\nu_{\max}$  /cm<sup>-1</sup>): 3399, 1729, 1683, 1626. <sup>1</sup>H NMR (300 MHz, DMSO-*d*<sub>6</sub>):  $\delta_{\text{H}}$  (ppm) 6.48-7.27 (9H, m, H-Ar), 9.10 (1H, s, NH), 9.99 (1H, s, NH), 11.67 (1H, s, NH), 12.00 (1H, s, NH), 12.55 (1H, s, NH). <sup>13</sup>C NMR

(75 MHz, DMSO-*d*<sub>6</sub>):  $\delta_C$  (ppm) 47.9, 90.1, 100.6, 109.4, 121.8, 123.8, 128.1, 128.2, 128.7, 129.1, 137.5, 139.9, 142.8, 145.3, 147.1, 159.6, 173.9, 178.9. Anal. Calcd for C<sub>23</sub>H<sub>18</sub>N<sub>6</sub>O<sub>3</sub>: C, 64.78; H, 4.25; N, 19.71. Found: C, 64.75; H, 4.28; N, 19.69.

5-Bromo-3'-phenyl-spiro[indoline-3,4'pyrazolo[4',3':5,6]pyrido[2,3-d]pyrimidine]-2,5',7'(6'H,8'H,9'H)-trione (**4b**):

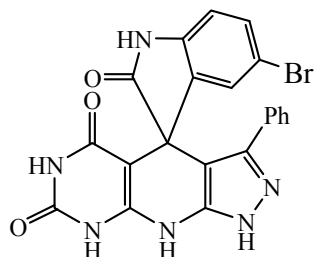

White powder (89%); MP >300 °C. IR (KBr) ( $\nu_{\max}$  /cm<sup>-1</sup>): 3460, 3203, 1727, 1606. <sup>1</sup>H NMR (300 MHz, DMSO-*d*<sub>6</sub>):  $\delta_H$  (ppm) 6.41-7.32 (8H, m, H-Ar), 9.37 (1H, s, NH), 10.07 (1H, s, NH), 10.22 (1H, s, NH), 10.57 (1H, s, NH), 12.54 (1H, brs, NH). <sup>13</sup>C NMR (75 MHz, DMSO-*d*<sub>6</sub>):  $\delta_C$  (ppm) 48.2, 85.3, 100.4, 111.2, 113.3, 126.4, 128.3, 128.8, 129.2, 130.5, 140.4, 142.1, 148.0, 150.2, 162.4, 179.2. Anal. Calcd for C<sub>21</sub>H<sub>13</sub>BrN<sub>6</sub>O<sub>3</sub>: C, 52.85; H, 2.75; N, 17.61. Found: C, 52.82; H, 2.79; N, 17.64.

5-Nitro-3'-phenyl-spiro[indoline-3,4'pyrazolo[4',3':5,6]pyrido[2,3-d]pyrimidine]-2,5',7'(6'H,8'H,9'H)-trione (**4c**):

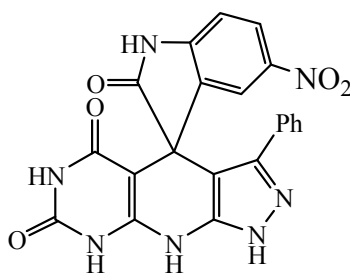

White powder (93%); MP >300 °C. IR (KBr) ( $\nu_{\max}$  /cm<sup>-1</sup>): 3313, 1723, 1623. <sup>1</sup>H NMR (300 MHz, DMSO-*d*<sub>6</sub>):  $\delta_H$  (ppm) 6.60-8.02 (8H, m, H-Ar), 9.21 (1H, s, NH), 10.74 (1H, s, NH), 11.72 (1H, s, NH), 12.08 (1H, s, NH), 12.68 (1H, s, NH). <sup>13</sup>C NMR (75 MHz, DMSO-*d*<sub>6</sub>):  $\delta_C$  (ppm) 47.9, 89.0, 99.7, 109.2, 119.5, 125.6, 128.4, 128.8, 128.9,

129.4, 138.0, 142.0, 142.5, 145.2, 147.7, 149.2, 159.9, 174.1, 179.7. Anal. Calcd for  $C_{21}H_{13}N_7O_5$ : C, 56.89; H, 2.96; N, 22.11. Found: C, 56.86; H, 2.93; N, 22.14.

**3'-Phenyl-7'-thioxo-spiro[indoline-3,4'-pyrazolo[4',3':5,6]pyrido[2,3-d]pyrimidine]- 2,5'(6'H,8'H,9'H)-dione (4d):**

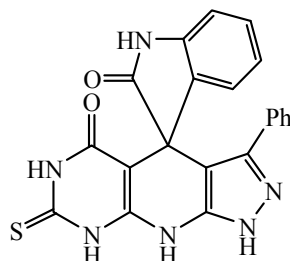

White powder (88%); MP >300 °C. IR (KBr) ( $\nu_{\max}$  / $\text{cm}^{-1}$ ): 3409, 3274, 3049, 1687, 1626.  $^1\text{H}$  NMR (300 MHz,  $\text{DMSO}-d_6$ ):  $\delta_{\text{H}}$  (ppm) 6.49-7.27 (9H, m, H-Ar), 9.10 (1H, s, NH), 9.99 (1H, s, NH), 11.68 (1H, s, NH), 12.00 (1H, s, NH), 12.55 (1H, s, NH).  $^{13}\text{C}$  NMR (75 MHz,  $\text{DMSO}-d_6$ ):  $\delta_{\text{C}}$  (ppm) 47.9, 91.0, 100.6, 109.4, 121.8, 123.8, 128.1, 128.2, 128.8, 129.1, 137.5, 139.9, 142.8, 145.3, 147.1, 169.6, 173.9, 178.9. Anal. Calcd for  $C_{21}H_{14}N_6O_2S$ : C, 60.86; H, 3.40; N, 20.28. Found: C, 60.89; H, 3.43; N, 20.26.

**1',3'-diphenyl-spiro[indoline-3,4'-pyrazolo[4',3':5,6]pyrido[2,3-d]pyrimidine]- 2,5',7'(6'H,8'H,9'H)-trione (4e)**

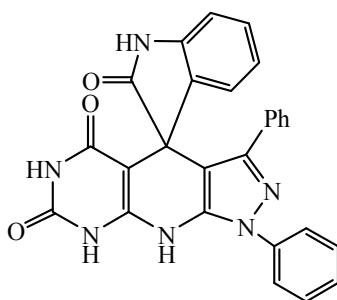

White powder (94%); MP >300 °C. IR (KBr) ( $\nu_{\max}$  / $\text{cm}^{-1}$ ): 3219, 1741, 1622.  $^1\text{H}$  NMR (300 MHz,  $\text{DMSO}-d_6$ ):  $\delta_{\text{H}}$  (ppm) 6.50-7.69 (14H, m, H-Ar), 9.36 (1H, s, NH), 9.93 (1H, s, NH), 10.18 (1H, s, NH), 10.67 (1H, s, NH).  $^{13}\text{C}$  NMR (75 MHz,  $\text{DMSO}-d_6$ ):  $\delta_{\text{C}}$  (ppm) 48.3, 88.1, 100.7, 109.4, 121.7, 123.4, 124.1, 127.8, 128.2, 128.3, 128.9, 130.3, 132.9, 136.7, 137.4, 137.9, 142.9, 146.5, 149.8, 149.9, 162.2, 179.1. Anal.

Calcd for C<sub>27</sub>H<sub>18</sub>N<sub>6</sub>O<sub>3</sub>: C, 68.35; H, 3.82; N, 17.71. Found: C, 68.31; H, 3.85; N, 17.74.

**5-Bromo-1',3'-diphenyl-spiro[indoline-3,4'-pyrazolo[4',3':5,6]pyrido[2,3-d]pyrimidine]-2,5', 7'(6'H,8'H,9'H)-trione (4f):**

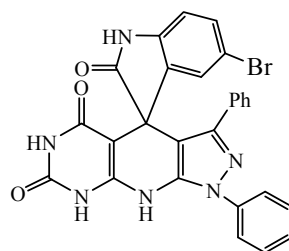

White powder (92%); mp >300 °C. IR (KBr) ( $\nu_{\max}$  /cm<sup>-1</sup>): 3209, 1737, 1714, 1621. <sup>1</sup>H NMR (300 MHz, DMSO-*d*<sub>6</sub>):  $\delta_H$  (ppm) 6.43-7.70 (13H, m, H-Ar), 9.43 (1H, s, NH), 10.12 (1H, s, NH), 10.19 (1H, s, NH), 10.77 (1H, s, NH). <sup>13</sup>C NMR (75 MHz, DMSO-*d*<sub>6</sub>):  $\delta_C$  (ppm) 48.5, 87.5, 100.12, 111.2, 113.3, 123.5, 126.9, 127.9, 128.3, 128.5, 128.8, 130.3, 130.8, 132.8, 136.8, 137.8, 139.6, 142.2, 146.7, 149.7, 149.8, 162.3, 178.8. Anal. Calcd for C<sub>27</sub>H<sub>17</sub>BrN<sub>6</sub>O<sub>3</sub>: C, 58.60; H, 3.10; N, 15.19. Found: C, 58.57; H, 3.07; N, 15.22.

**5-Nitro-1',3'-diphenyl-spiro[indoline-3,4'-pyrazolo[4',3':5,6]pyrido[2,3-d]pyrimidine]-2,5', 7'(6'H,8'H,9'H)-trione (4g):**

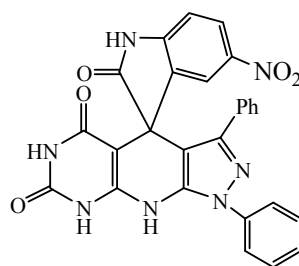

White powder (95%); mp >300 °C. IR (KBr) ( $\nu_{\max}$  /cm<sup>-1</sup>): 3404, 3101, 1632, 1580. <sup>1</sup>H NMR (300 MHz, DMSO-*d*<sub>6</sub>):  $\delta_H$  (ppm) 6.63-8.06 (13H, m, H-Ar), 9.54 (1H, s, NH), 10.28 (1H, s, NH), 10.73 (1H, s, NH), 10.82 (1H, s, NH). <sup>13</sup>C NMR (75 MHz, DMSO-*d*<sub>6</sub>):  $\delta_C$  (ppm) 48.3, 87.0, 99.6, 109.3, 119.7, 123.6, 125.7, 128.0, 128.4, 128.6, 128.9, 130.3, 132.5, 136.9, 137.8, 138.0, 142.5, 147.1, 149.3, 149.7, 149.8, 162.4,

179.9. Anal. Calcd for C<sub>27</sub>H<sub>17</sub>N<sub>7</sub>O<sub>5</sub>: C, 62.43; H, 3.30; N, 18.87. Found: C, 62.45; H, 3.34; N, 18.84.

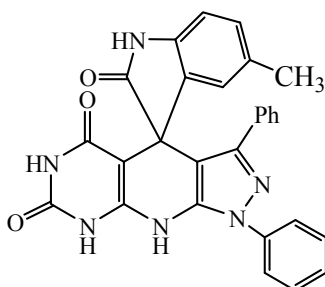

**5-Methyl-1',3'-diphenyl-spiro[indoline-3,4'-pyrazolo[4',3':5,6]pyrido[2,3-d]pyrimidine]-2,5',7'(6'H,8'H,9'H)-trione (4h):**

White powder (88%); mp >300 °C. IR (KBr) ( $\nu_{\max}$  /cm<sup>-1</sup>): 3209, 1738, 1713, 1611. <sup>1</sup>H NMR (300 MHz, DMSO-*d*<sub>6</sub>):  $\delta_H$  (ppm) 2.21 (3H, s, CH<sub>3</sub>), 6.42-7.70 (13H, m, H-Ar), 9.38 (1H, s, NH), 9.86 (1H, s, NH), 10.20 (1H, s, NH), 10.70 (1H, s, NH). <sup>13</sup>C NMR (75 MHz, DMSO-*d*<sub>6</sub>):  $\delta_C$  (ppm) 21.1, 48.4, 88.2, 100.8, 109.2, 23.5, 124.8, 127.8, 128.2, 128.4, 128.9, 130.3, 130.5, 133, 136.8, 137.6, 137.9, 140.5, 146.5, 149.8, 149.9, 162.2, 179. Anal. Calcd for C<sub>28</sub>H<sub>20</sub>N<sub>6</sub>O<sub>3</sub>: C, 68.84; H, 4.13; N, 17.20. Found: C, 68.80; H, 4.16; N, 17.17.

**1',3'-Diphenyl-7'-thioxo-spiro[indoline-3,4'-pyrazolo[4',3':5,6]pyrido[2,3-d]pyrimidine]-2,5'(6'H,8'H,9'H)-dione (4i):**

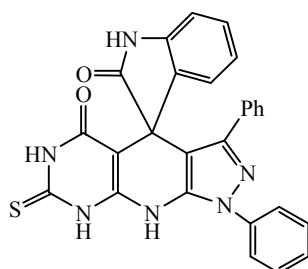

White powder (92%); mp >300 °C. IR (KBr) ( $\nu_{\max}$  /cm<sup>-1</sup>): 3301, 3049, 1736, 1668. <sup>1</sup>H NMR (300 MHz, DMSO-*d*<sub>6</sub>):  $\delta_H$  (ppm) 6.52-7.71 (14H, m, H-Ar), 9.41 (1H, s, NH), 10.04 (1H, s, NH), 11.75 (1H, s, NH), 12.17 (1H, s, NH). <sup>13</sup>C NMR (75 MHz, DMSO-*d*<sub>6</sub>):  $\delta_C$  (ppm) 48.4, 92.2, 100.4, 109.5, 121.9, 123.4, 124.5, 127.9, 128.3, 128.5, 128.9, 130.3, 132.8, 136.2, 136.9, 137.8, 142.9, 145.9, 149.8, 159.7, 173.8,

178.6. Anal. Calcd for C<sub>27</sub>H<sub>18</sub>N<sub>6</sub>O<sub>2</sub>S: C, 66.11; H, 3.70; N, 17.13. Found: C, 66.14; H, 3.74; N, 17.10.

**5-Bromo-1',3'-diphenyl-7'-thioxo-spiro[indoline-3,4'-pyrazolo[4',3':5,6]pyrido[2,3-*d*]pyrimidine]-2,5'(6'*H*,8'*H*,9'*H*)-dione (4j):**

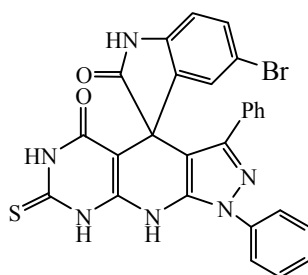

White powder (89%); mp >300 °C. IR (KBr) ( $\nu_{\max}$  /cm<sup>-1</sup>): 3337, 1741, 1663. <sup>1</sup>H NMR (300 MHz, DMSO-*d*<sub>6</sub>):  $\delta_H$  (ppm) 6.45-7.68 (13H, m, H-Ar), 9.44 (1H, s, NH), 10.21 (1H, s, NH), 11.73 (1H, s, NH), 12.24 (1H, s, NH). <sup>13</sup>C NMR (75 MHz, DMSO-*d*<sub>6</sub>):  $\delta_C$  (ppm) 48.6, 91.5, 99.8, 111.3, 113.5, 123.4, 127.2, 127.9, 128.4, 128.6, 128.8, 130.3, 131.1, 132.6, 136.3, 137.7, 139.1, 142.2, 146.2, 149.8, 159.7, 173.8, 178.4. Anal. Calcd for C<sub>27</sub>H<sub>17</sub>BrN<sub>6</sub>O<sub>2</sub>S: C, 56.95; H, 3.01; N, 14.76. Found: C, 56.92; H, 3.04; N, 14.73.

**5-Nitro-1',3'-diphenyl-7'-thioxo-spiro[indoline-3,4'-pyrazolo[4',3':5,6]pyrido[2,3-*d*]pyrimidine]-2,5'(6'*H*,8'*H*,9'*H*)-dione (4k):**

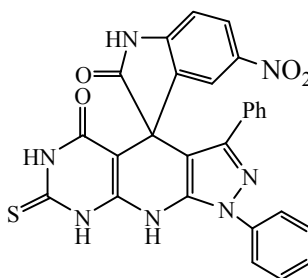

White powder (94%); mp >300 °C. IR (KBr) ( $\nu_{\max}$  /cm<sup>-1</sup>): 3378, 1700, 1642. <sup>1</sup>H NMR (300 MHz, DMSO-*d*<sub>6</sub>):  $\delta_H$  (ppm) 6.65-8.01 (13H, m, H-Ar), 9.54 (1H, s, NH), 10.82 (1H, s, NH), 11.79 (1H, s, NH), 12.28 (1H, s, NH). <sup>13</sup>C NMR (75 MHz, DMSO-*d*<sub>6</sub>):  $\delta_C$  (ppm) 48.3, 91.0, 99.3, 109.3, 120.1, 123.4, 125.9, 128.1, 128.4, 128.8, 128.9, 130.3, 132.4, 136.4, 137.4, 137.6, 142.6, 146.5, 149.3, 149.8, 159.9, 173.9, 179.4. Anal. Calcd for C<sub>27</sub>H<sub>17</sub>N<sub>7</sub>O<sub>4</sub>S: C, 60.55; H, 3.20; N, 18.31. Found: C, 60.52; H, 3.17; N, 18.28.



**5-Bromo-6',8'-dimethyl-1',3'-diphenyl-spiro[indoline-3,4'-pyrazolo[4',3':5,6]pyrido[2,3-d]pyrimidine]2,5',7'(6'H,8'H,9'H)-trione (4l)**

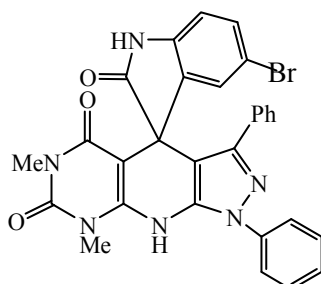

White powder (90%); MP >300 °C. IR (KBr) ( $\nu_{\max}$  / $\text{cm}^{-1}$ ): 3373, 3203, 1733, 1640, 1624.  $^1\text{H}$  NMR (300 MHz,  $\text{DMSO-}d_6$ ):  $\delta_{\text{H}}$  (ppm) 3.03 (3H, s,  $\text{CH}_3$ ), 3.54 (3H, s,  $\text{CH}_3$ ), 6.41-7.80 (13H, m, H-Ar), 9.73 (1H, s, NH), 10.14 (1H, s, NH). Anal. Calcd for  $\text{C}_{29}\text{H}_{21}\text{BrN}_6\text{O}_3$ : C, 59.91; H, 3.64; N, 14.45. Found: C, 59.94; H, 3.68; N, 14.42.

**1'-Phenyl-3'-(4-nitrophenyl)-spiro[indoline-3,4'-pyrazolo[4',3':5,6]pyrido[2,3-d]pyrimidine]2,5',7'(6'H,8'H,9'H)-trione (4n):**

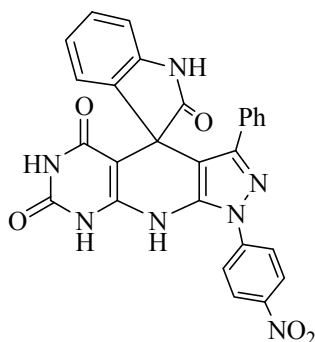

White powder (89%); mp >300 °C. IR (KBr) ( $\nu_{\max}$  / $\text{cm}^{-1}$ ): 3419, 3337, 1716, 1689.  $^1\text{H}$  NMR (300 MHz,  $\text{DMSO-}d_6$ ):  $\delta_{\text{H}}$  (ppm) 6.49-7.96 (9H, m, H-Ar), 7.97 (2H, d,  $J=9.0$  Hz, H-Ar), 8.45 (2H, d,  $J=9.0$  Hz, H-Ar), 9.64 (1H, s, NH), 9.99 (1H, s, NH), 10.52 (1H, s, NH), 10.77 (1H, s, NH).  $^{13}\text{C}$  NMR (75 MHz,  $\text{DMSO-}d_6$ ):  $\delta_{\text{C}}$  (ppm) 48.2, 88.6, 102.1, 109.5, 121.8, 123.1, 124.1, 125.7, 127.9, 128.4, 128.7, 128.8, 132.4, 137.1, 137.7, 142.9, 143.2, 145.9, 146.8, 150.0, 151.4, 162.2, 178.9. Anal. Calcd for  $\text{C}_{27}\text{H}_{17}\text{N}_7\text{O}_5$ : C, 62.43; H, 3.30; N, 18.87. Found: C, 62.46; H, 3.26; N, 18.90.

**5-Bromo-1'-phenyl-3'-(4-nitrophenyl)-spiro[indoline-3,4'-pyrazolo[4',3':5,6]pyrido[2,3-*d*]pyrimidine]2,5',7'(6'*H*,8'*H*,9'*H*)-trione (4o):**

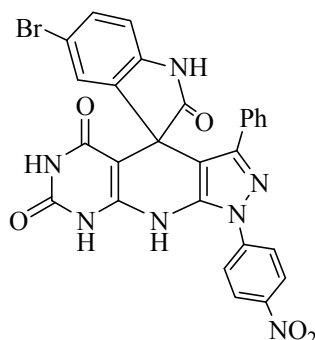

White powder (86%); mp >300 °C. IR (KBr) ( $\nu_{\max}$  / $\text{cm}^{-1}$ ): 3368, 3008, 1749, 1683, 1650.  $^1\text{H}$  NMR (300 MHz,  $\text{DMSO-}d_6$ ):  $\delta_H$  (ppm) 6.63-7.99 (8H, m, H-Ar), 7.98 (2H, d,  $J = 8.8$  Hz, H-Ar), 8.46 (2H, d,  $J = 8.7$  Hz, H-Ar), 9.68 (1H, s, NH), 10.14 (1H, s, NH), 10.48 (1H, s, NH), 10.83 (1H, s, NH).  $^{13}\text{C}$  NMR (75 MHz,  $\text{DMSO-}d_6$ ):  $\delta_C$  (ppm) 48.4, 87.9, 101.4, 111.3, 113.3, 123.2, 125.7, 127.0, 128.0, 128.8, 131.0, 132.2, 137.8, 139.3, 142.2, 143.2, 146.0, 146.9, 149.9, 151.3, 162.3, 178.6. Anal. Calcd for  $\text{C}_{27}\text{H}_{16}\text{BrN}_7\text{O}_5$ : C, 54.20; H, 2.70; N, 16.39. Found: C, 54.23; H, 2.73; N, 16.42.

**5-Nitro-1'-phenyl-3'-(4-nitrophenyl)-spiro[indoline-3,4'-pyrazolo[4',3':5,6]pyrido[2,3-*d*]pyrimidine]2,5',7'(6'*H*,8'*H*,9'*H*)-trione (4p):**

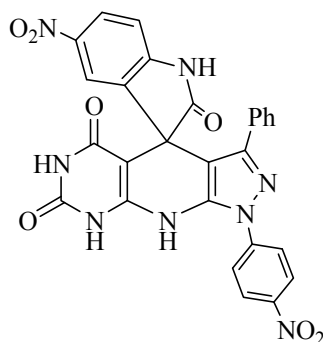

White powder (91%); mp >300 °C. IR (KBr) ( $\nu_{\max}$  / $\text{cm}^{-1}$ ): 3368, 3111, 1732, 1647.  $^1\text{H}$  NMR (300 MHz,  $\text{DMSO-}d_6$ ):  $\delta_H$  (ppm) 6.60-8.46 (12H, m, H-Ar), 9.77 (1H, s, NH), 10.55 (1H, s, NH), 10.74 (1H, s, NH), 10.87 (1H, s, NH). Anal. Calcd for  $\text{C}_{27}\text{H}_{16}\text{N}_8\text{O}_7$ : C, 57.45; H, 2.86; N, 19.85. Found: C, 57.42; H, 2.83; N, 19.82.

**5-Bromo-1',3'-diphenyl-7'-thioxo-spiro[indoline-3,4'-pyrazolo[4',3':5,6]pyrido[2,3-*d*]pyrimidine]-2,5'(6'*H*,8'*H*,9'*H*)-dione (4q):**

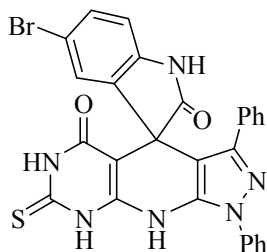

White powder (87%); mp >300 °C. IR (KBr) ( $\nu_{\max}$  / $\text{cm}^{-1}$ ): 3337, 1741, 1663.  $^1\text{H}$  NMR (300 MHz,  $\text{DMSO-}d_6$ ):  $\delta_H$  (ppm) 6.45-7.68 (13H, m, H-Ar), 9.44 (1H, s, NH), 10.21 (1H, s, NH), 11.73 (1H, s, NH), 12.24 (1H, s, NH).  $^{13}\text{C}$  NMR (75 MHz,  $\text{DMSO-}d_6$ ):  $\delta_C$  (ppm) 48.6, 91.5, 99.8, 111.3, 113.5, 123.4, 127.2, 127.9, 128.4, 128.6, 128.8, 130.3, 131.1, 132.6, 136.3, 137.7, 139.1, 142.2, 146.2, 149.8, 159.7, 173.8, 178.4. Anal. Calcd for  $\text{C}_{27}\text{H}_{17}\text{BrN}_6\text{O}_2\text{S}$ : C, 56.95; H, 3.01; N, 14.76. Found: C, 56.92; H, 3.04; N, 14.71.

Selected  $^1\text{H}$  and  $^{13}\text{C}$  NMR spectrums

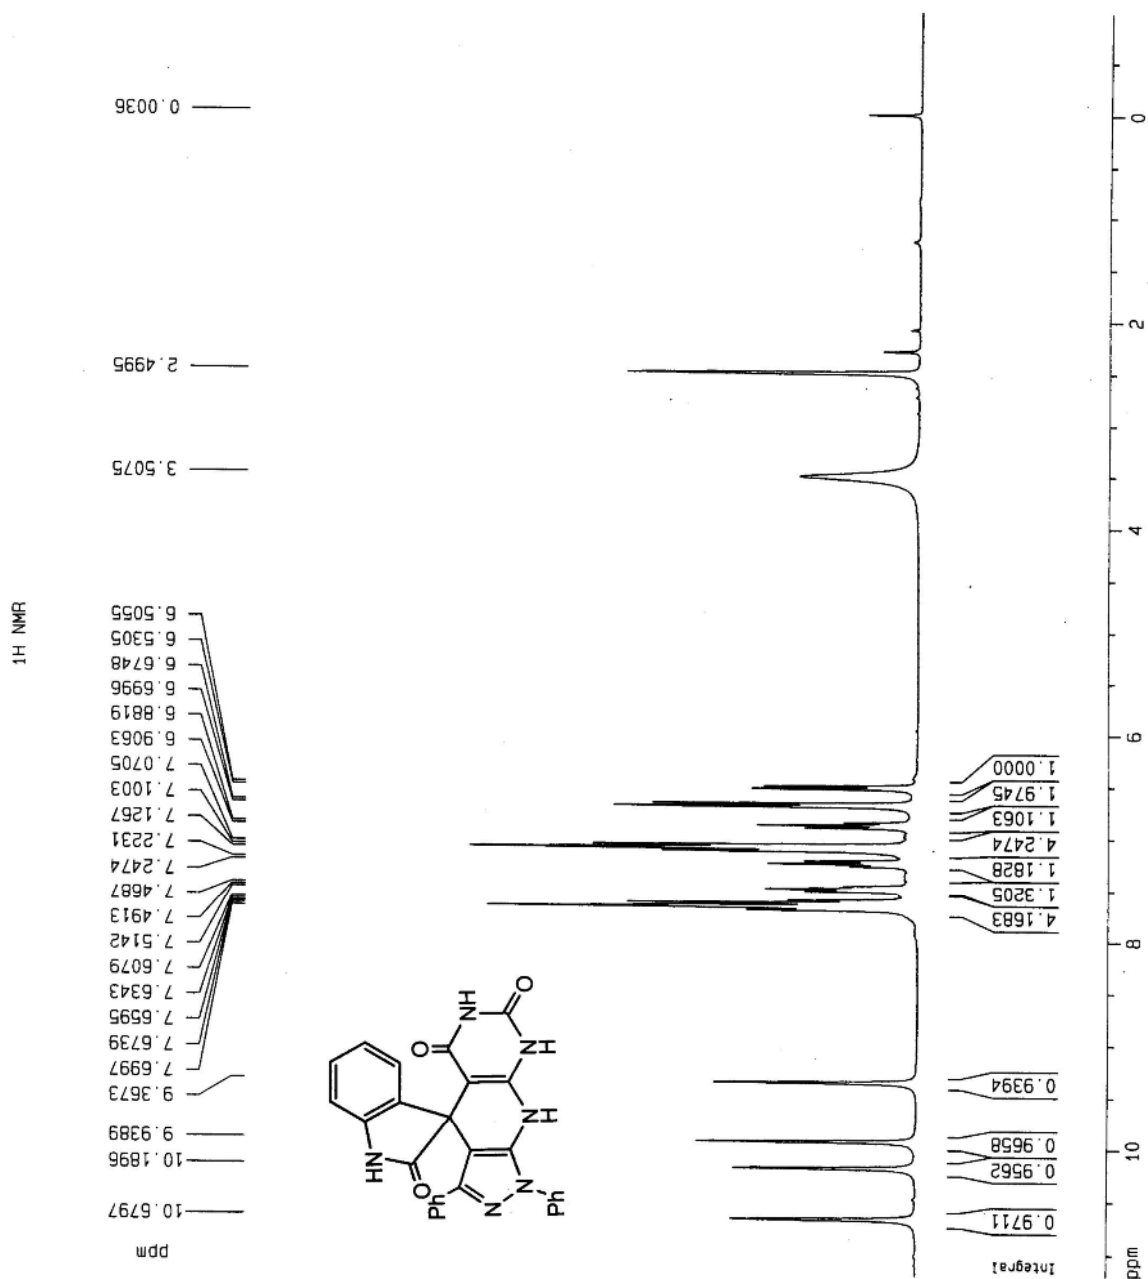

4e

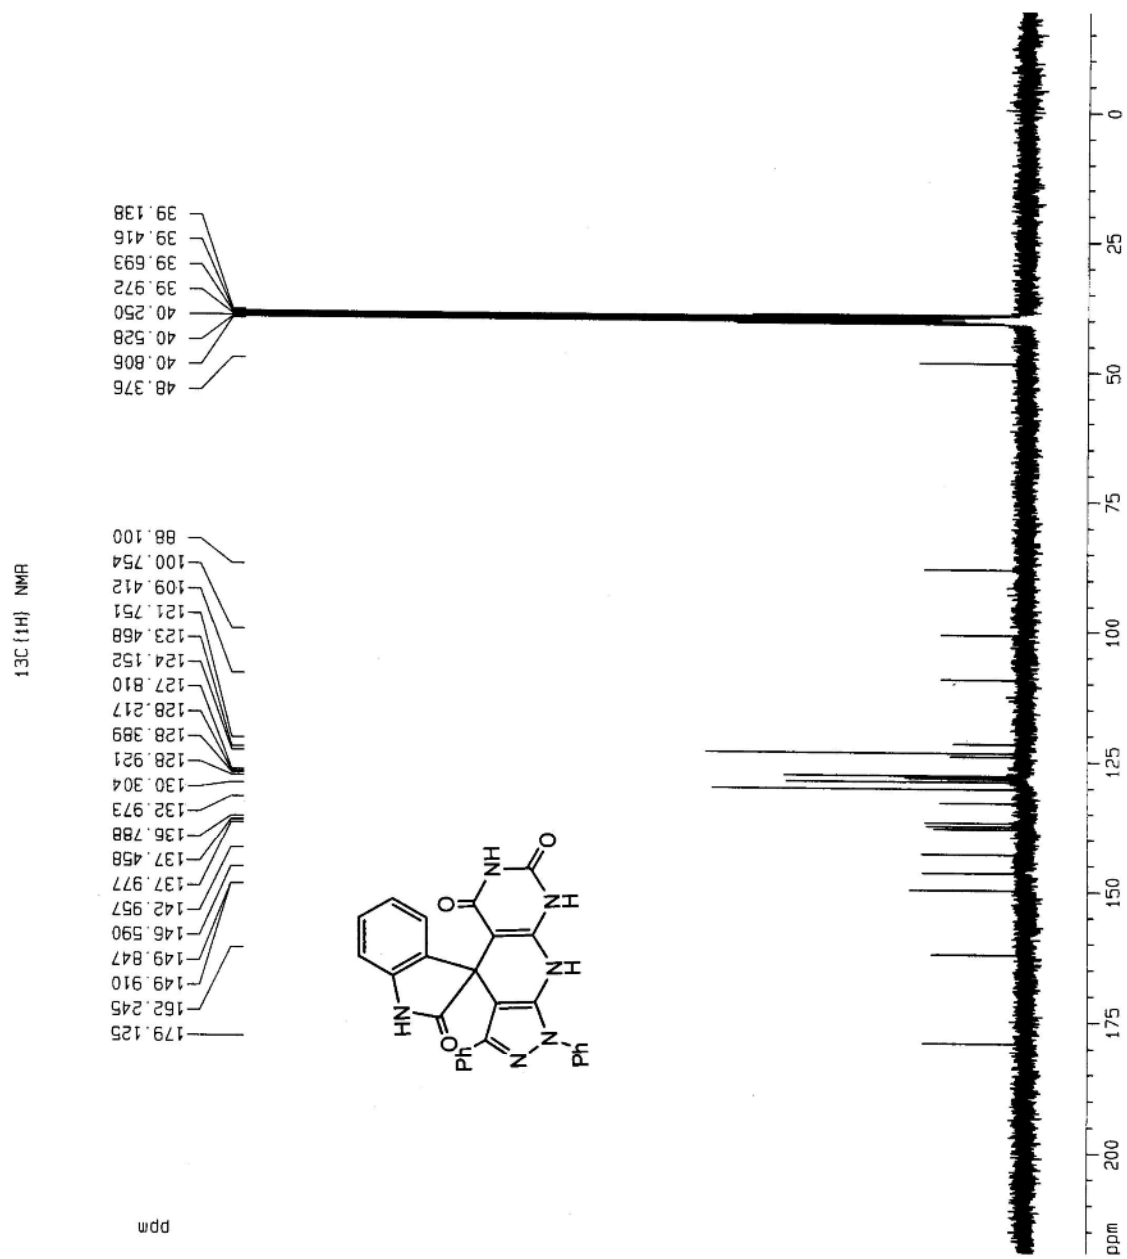

4e

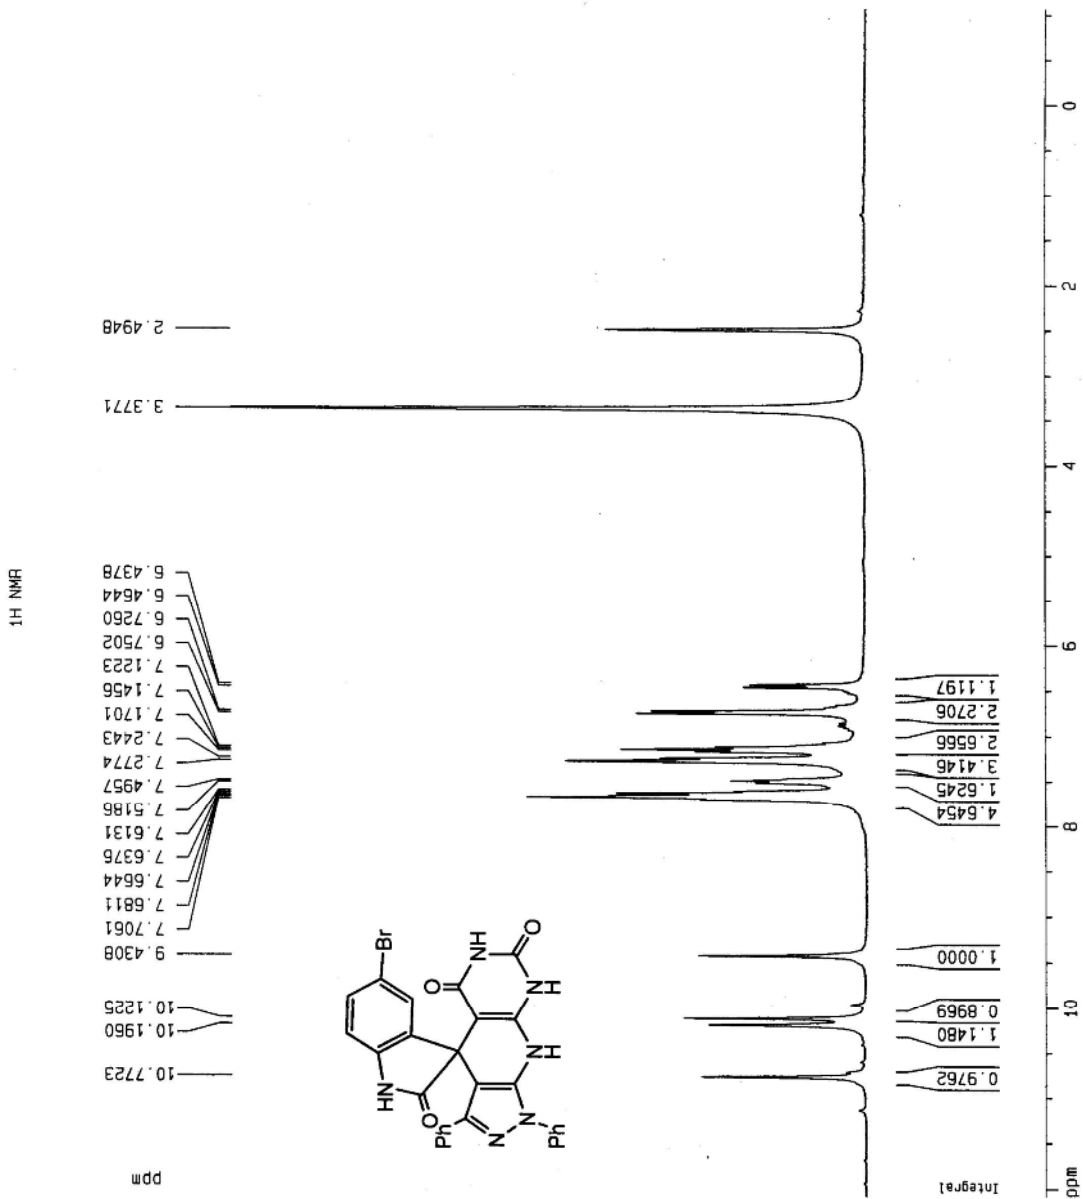

4f

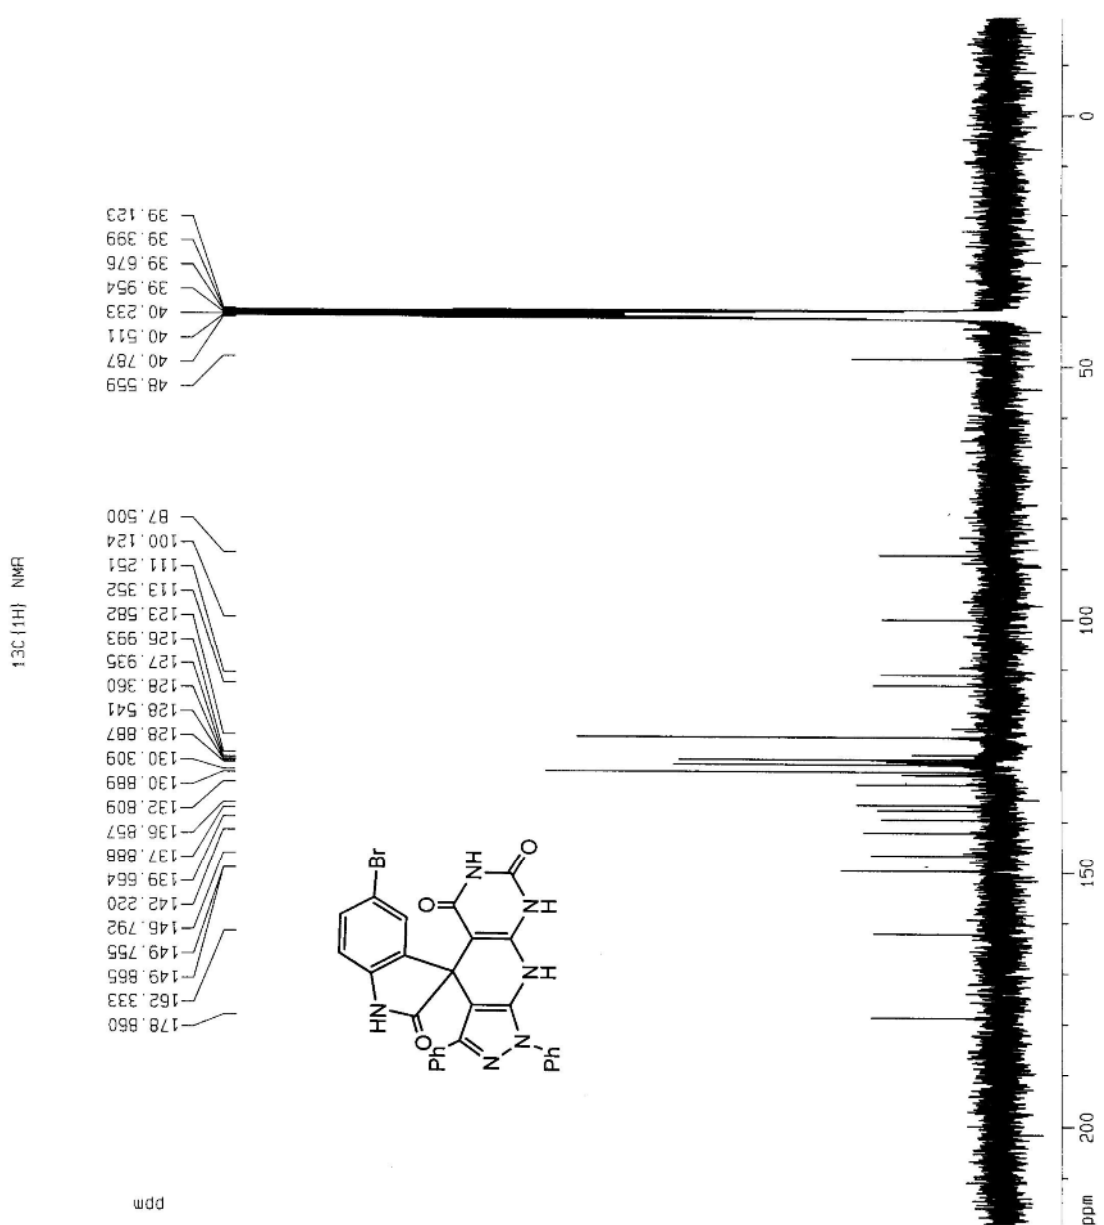

4f

4g

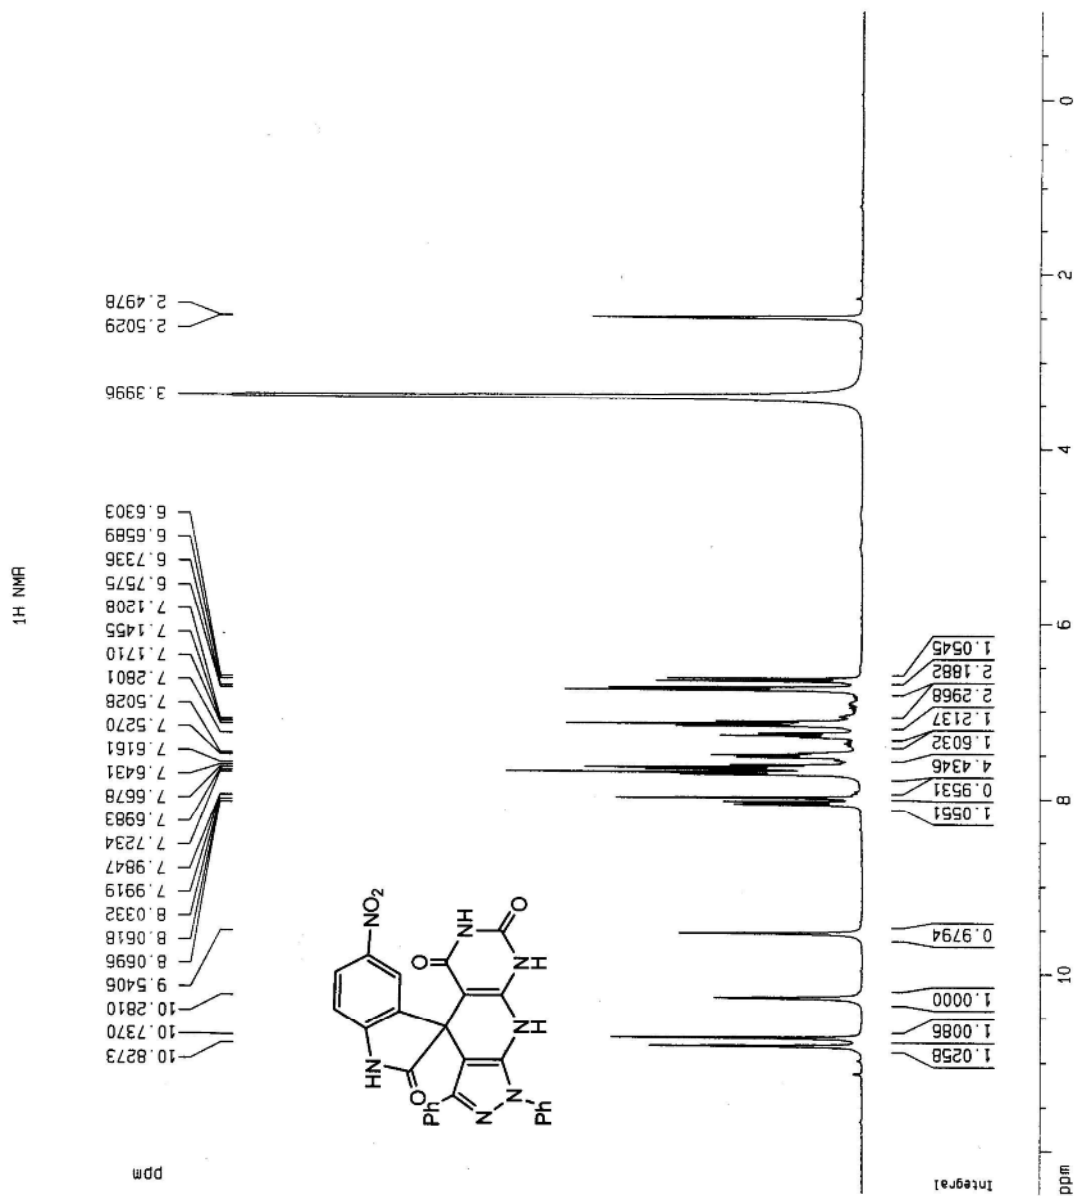



4g

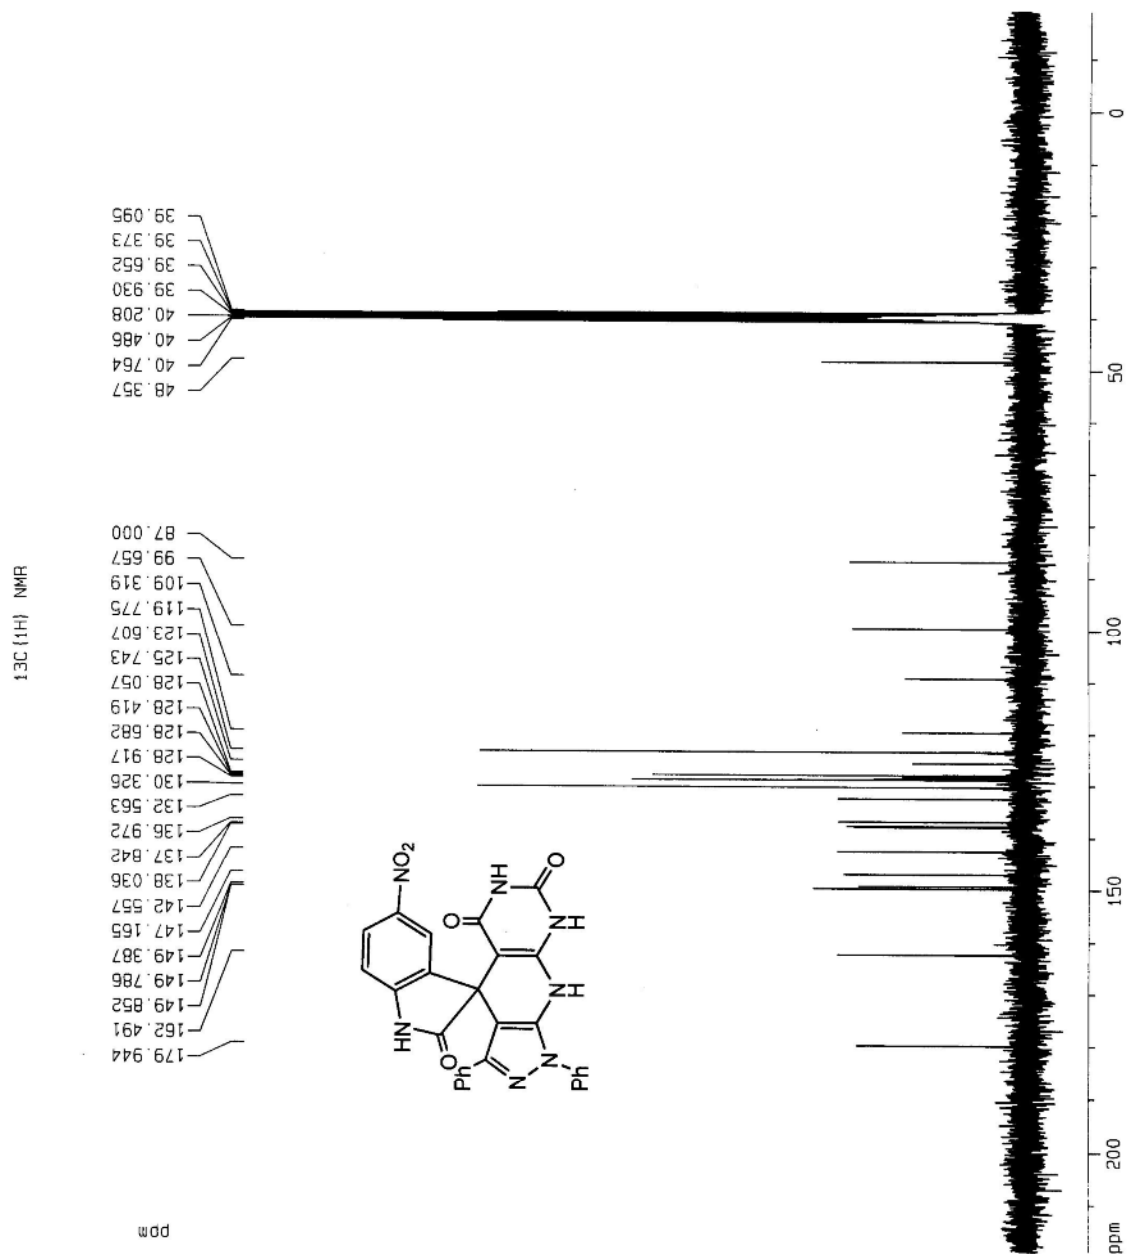

IPT-1  
<sup>1</sup>H NMR

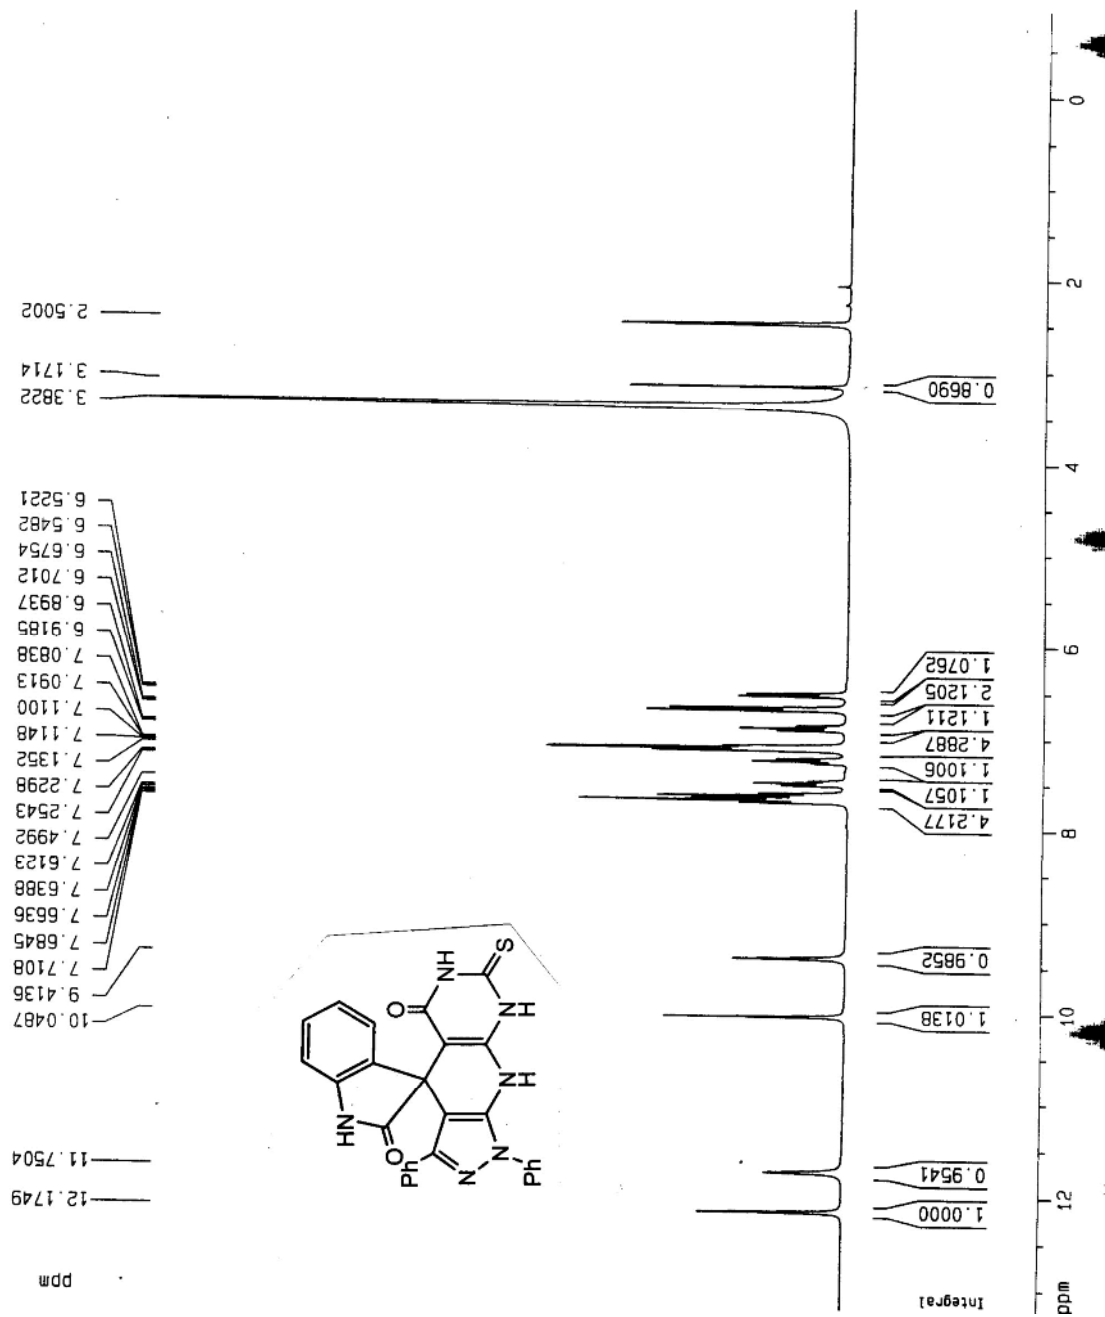

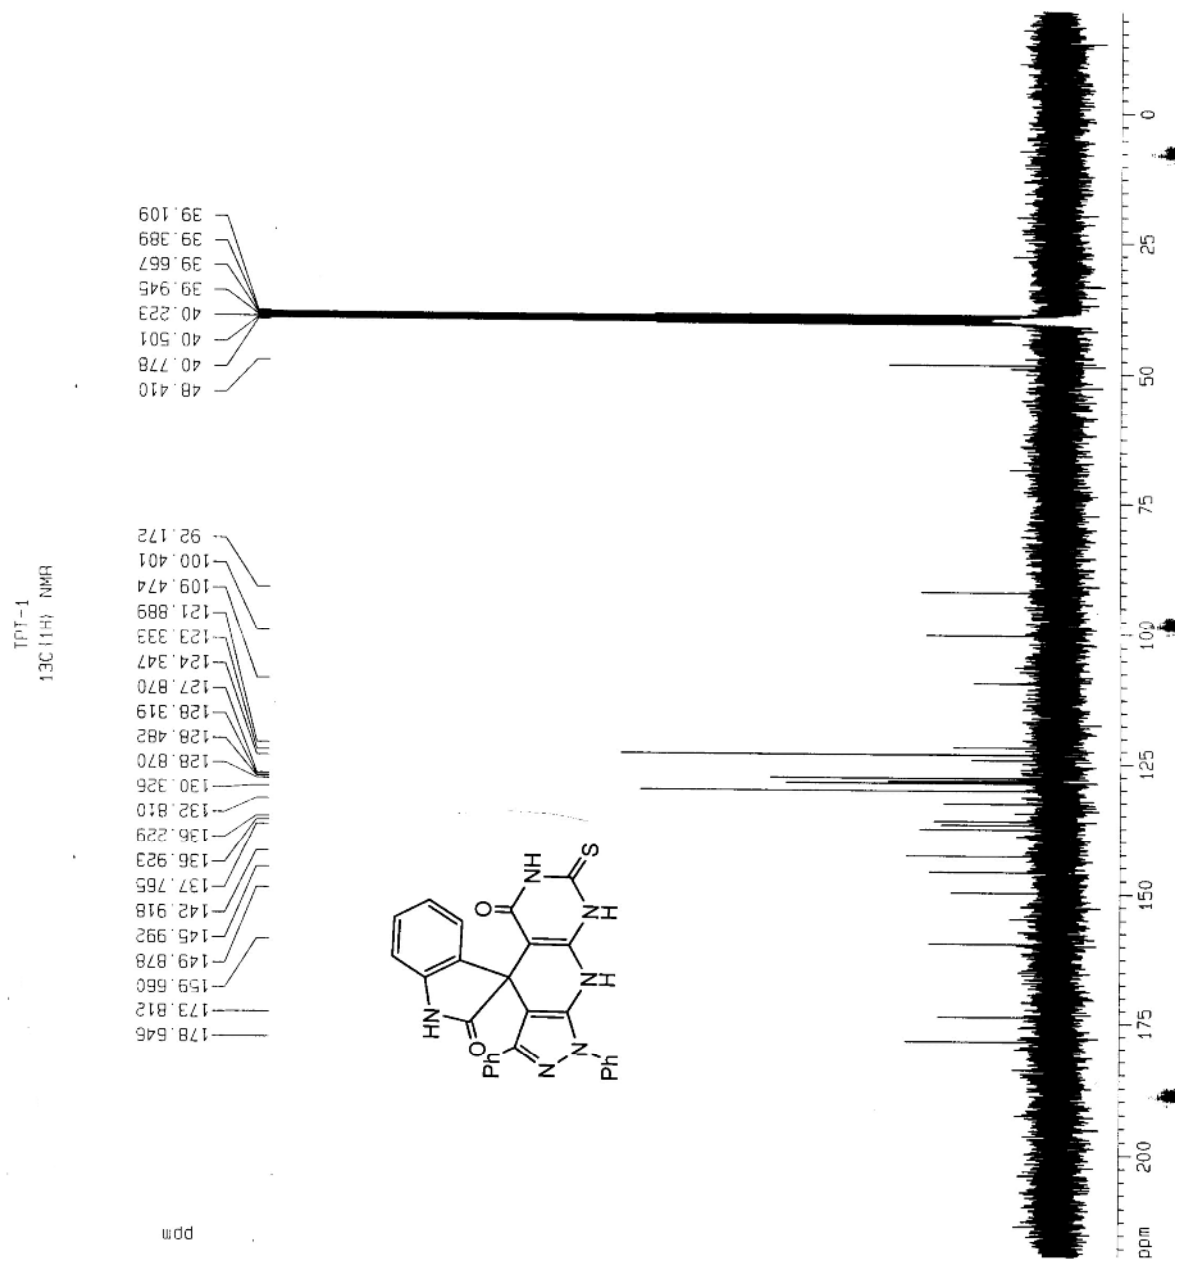

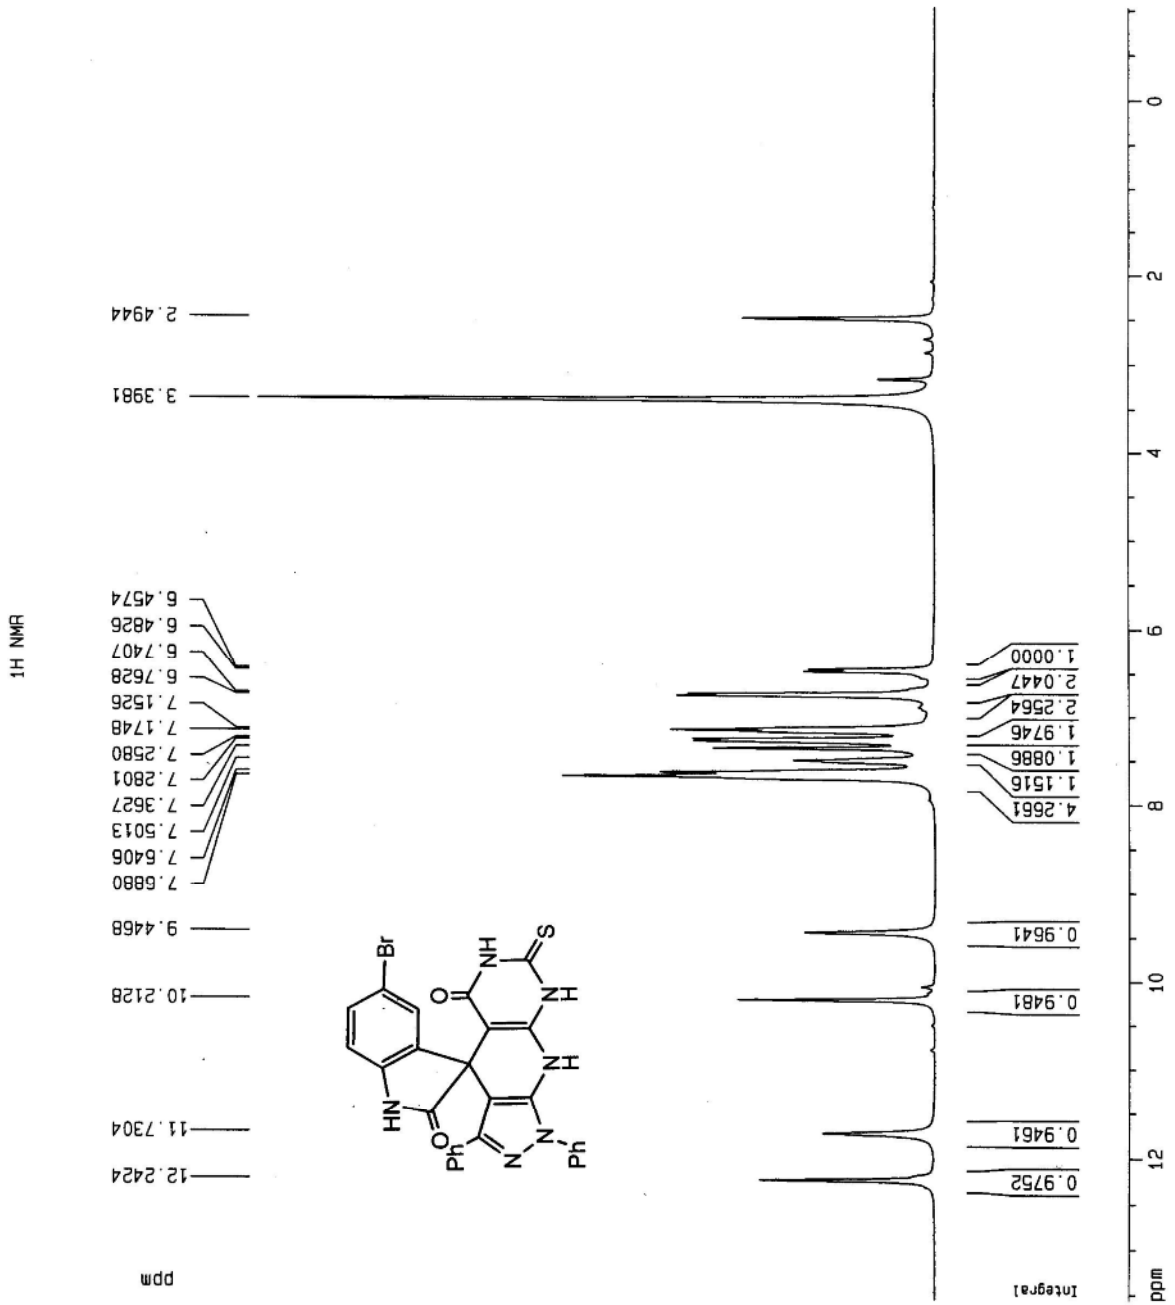

4j

4j

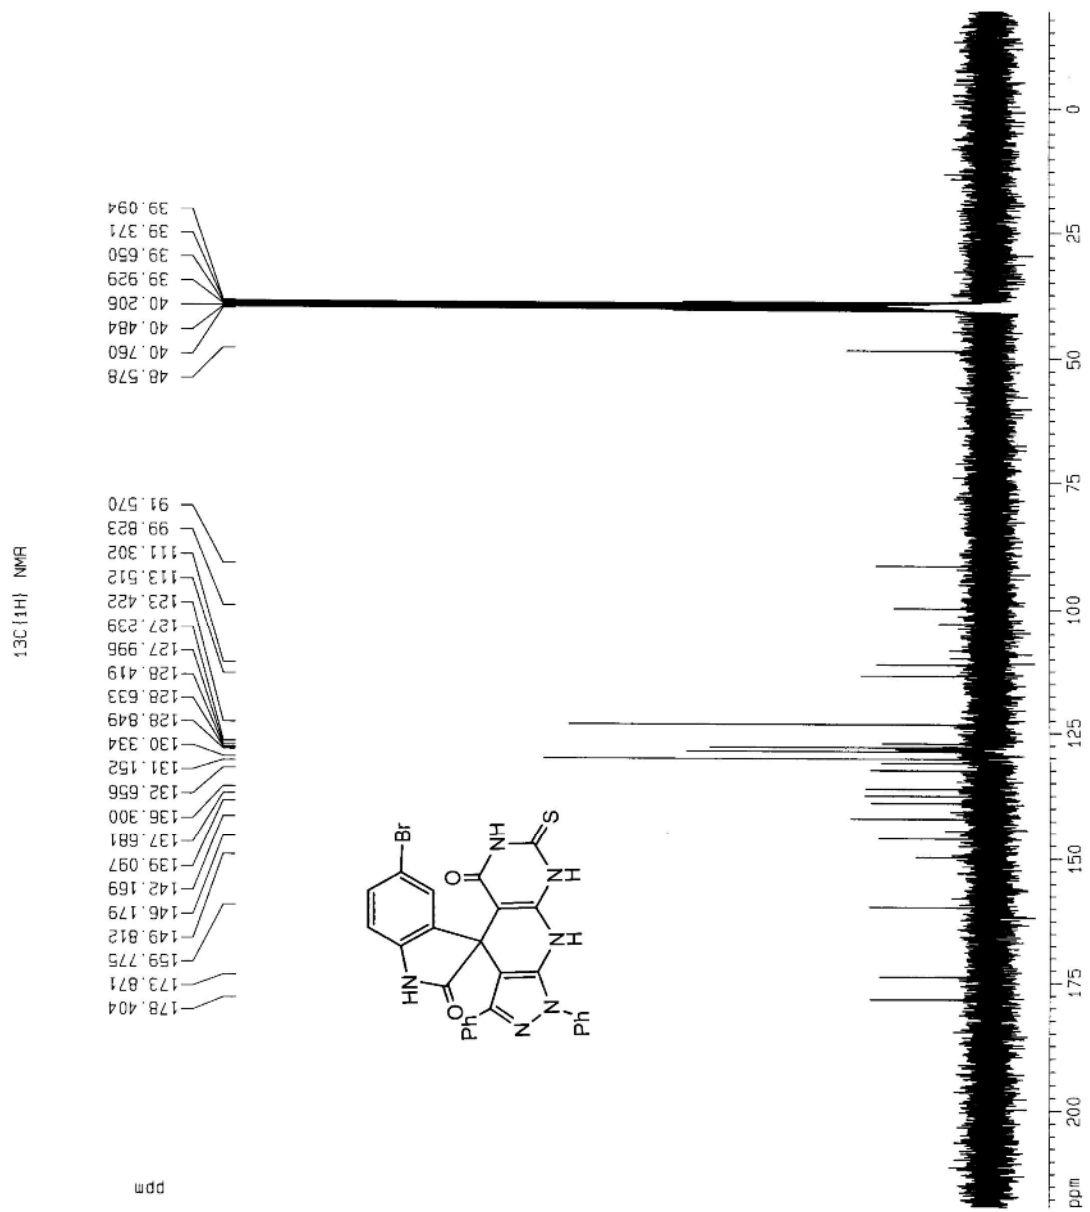

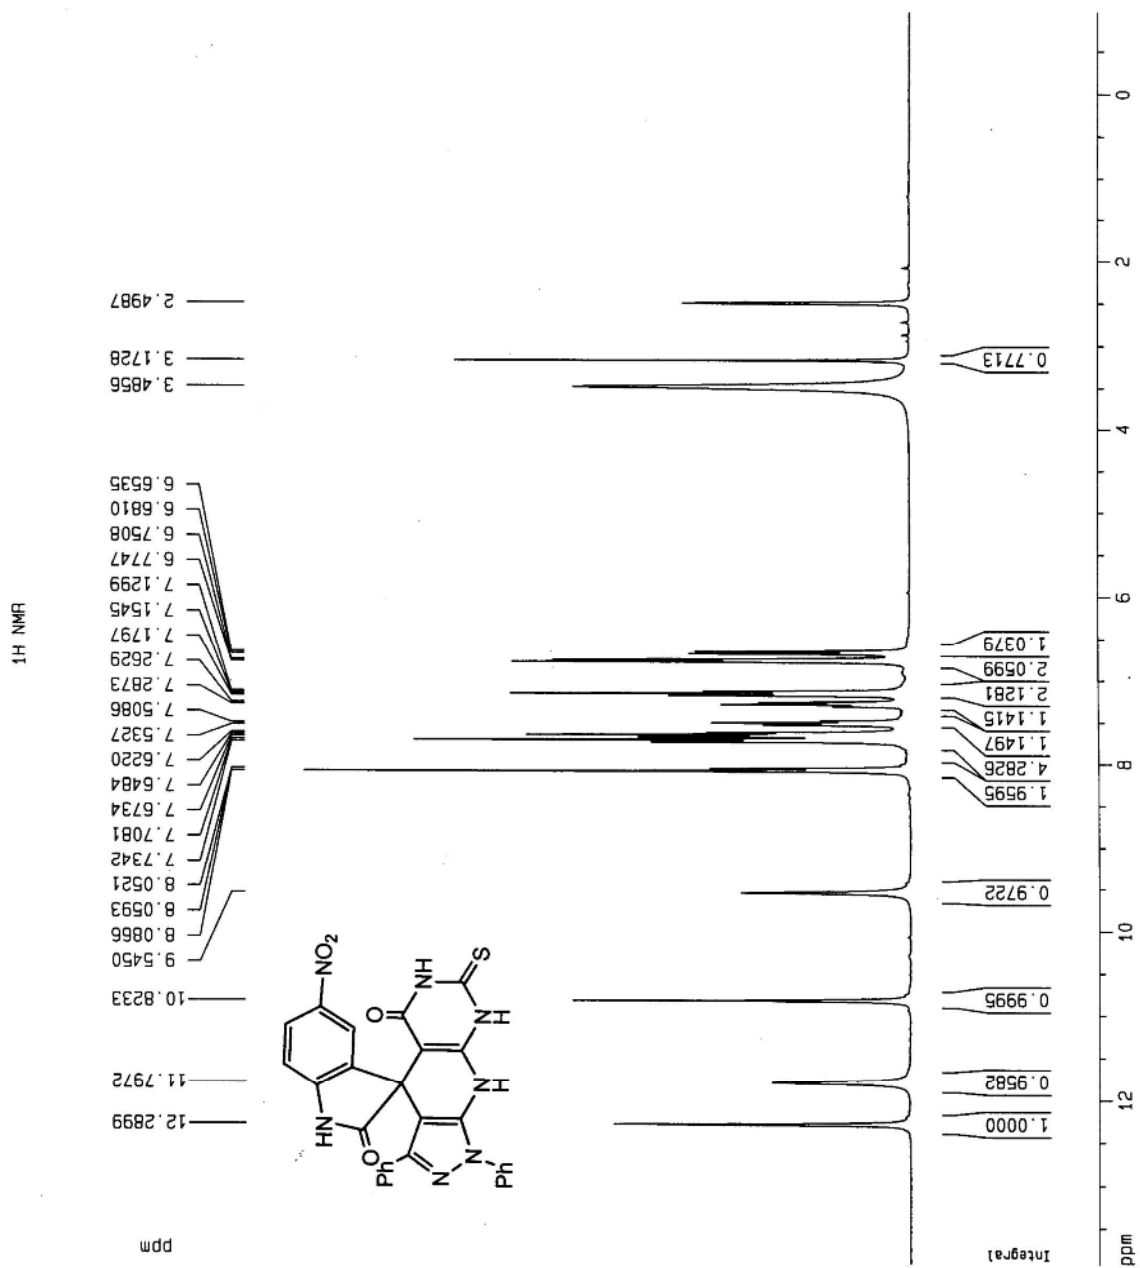

4k

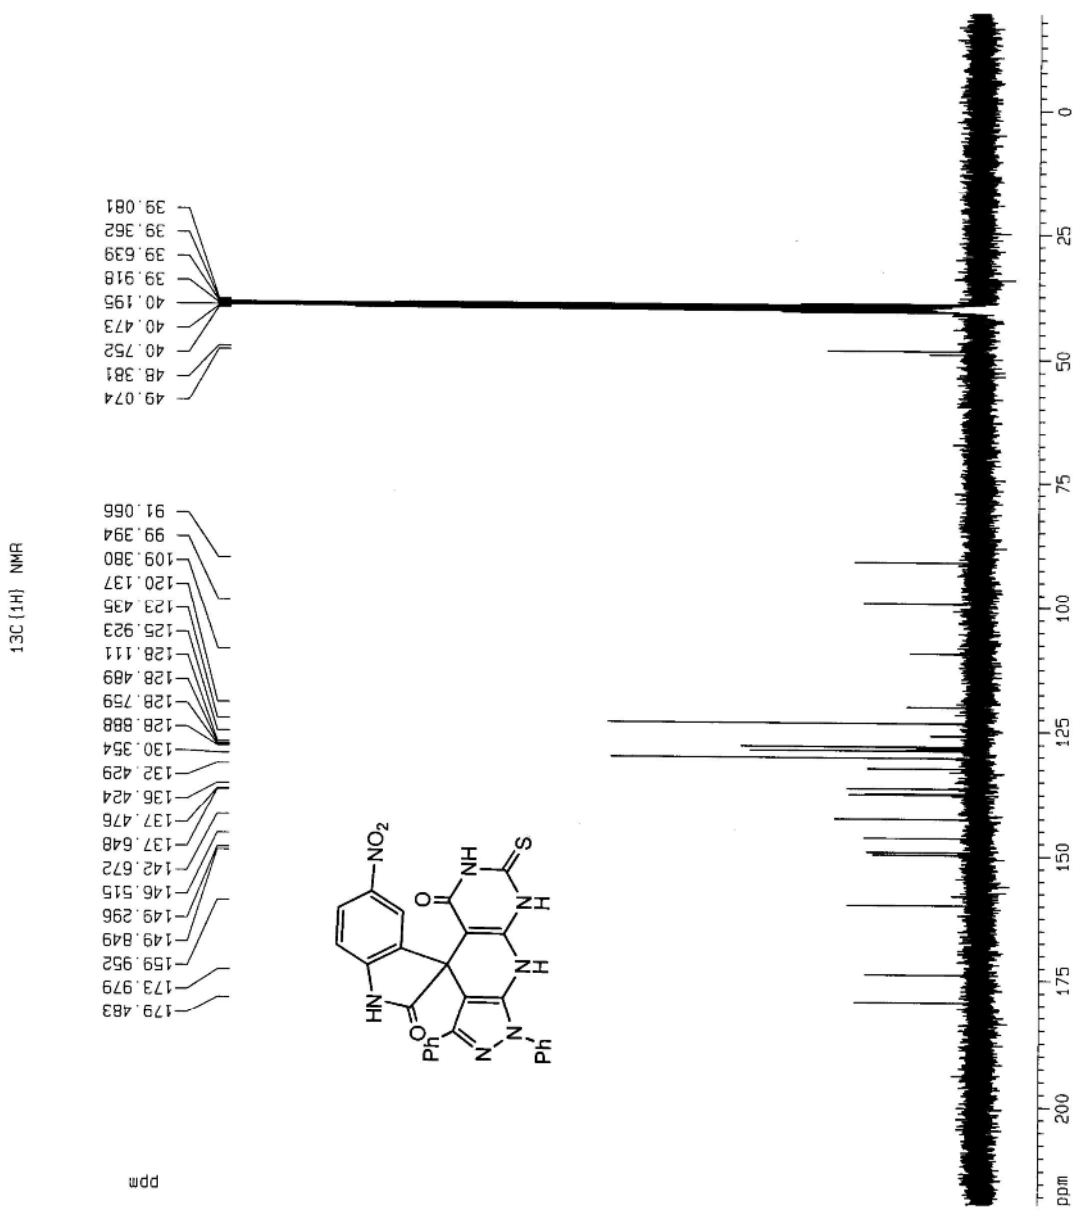

4k

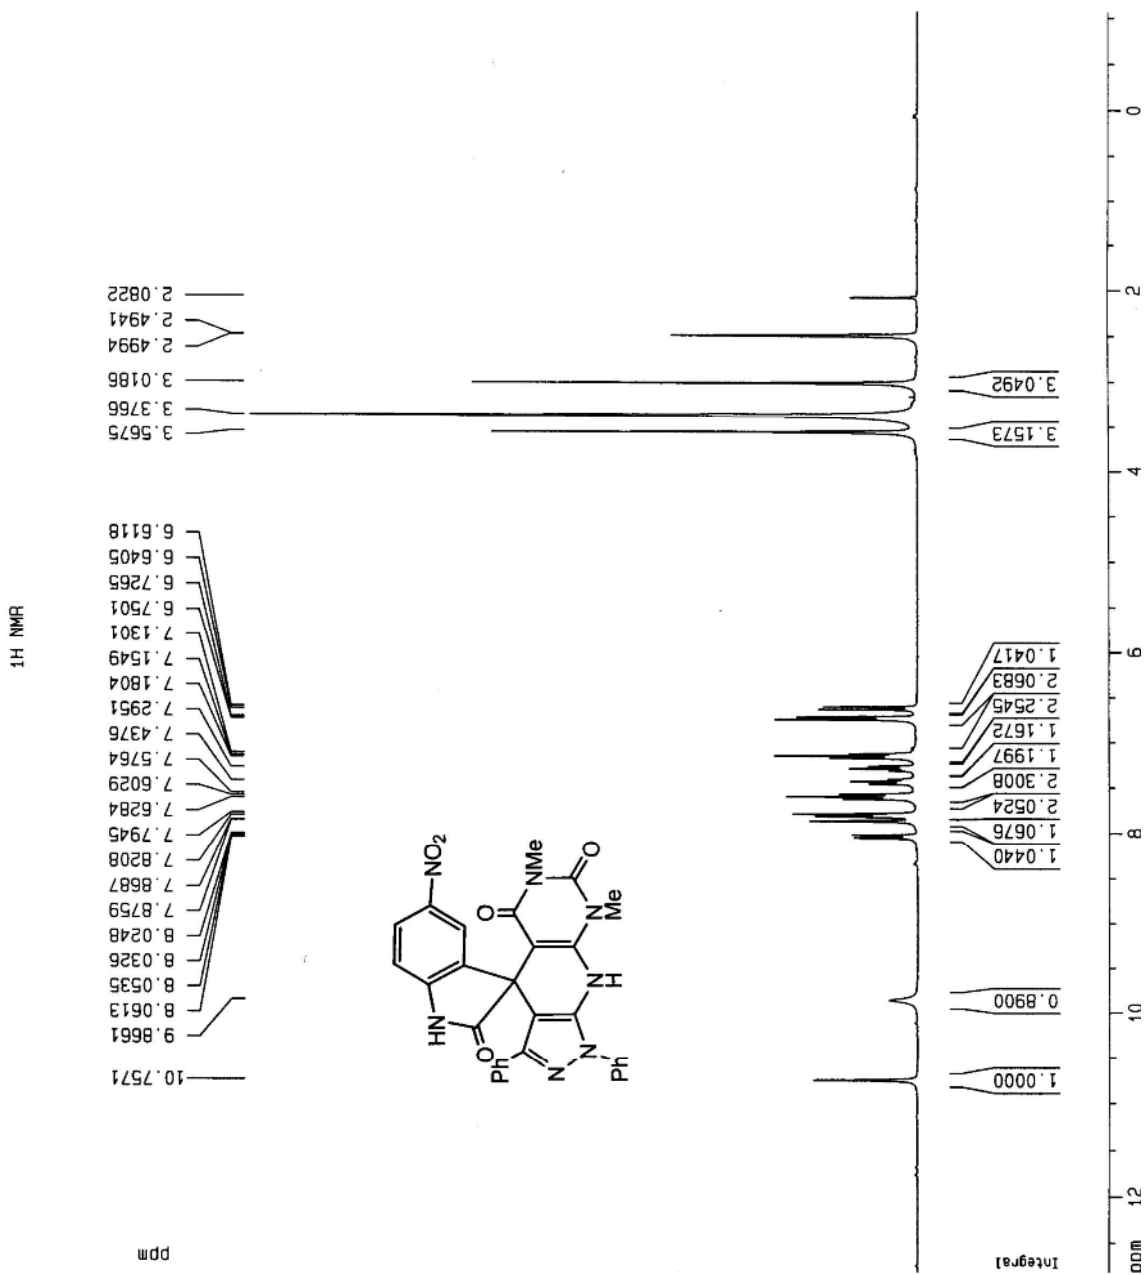



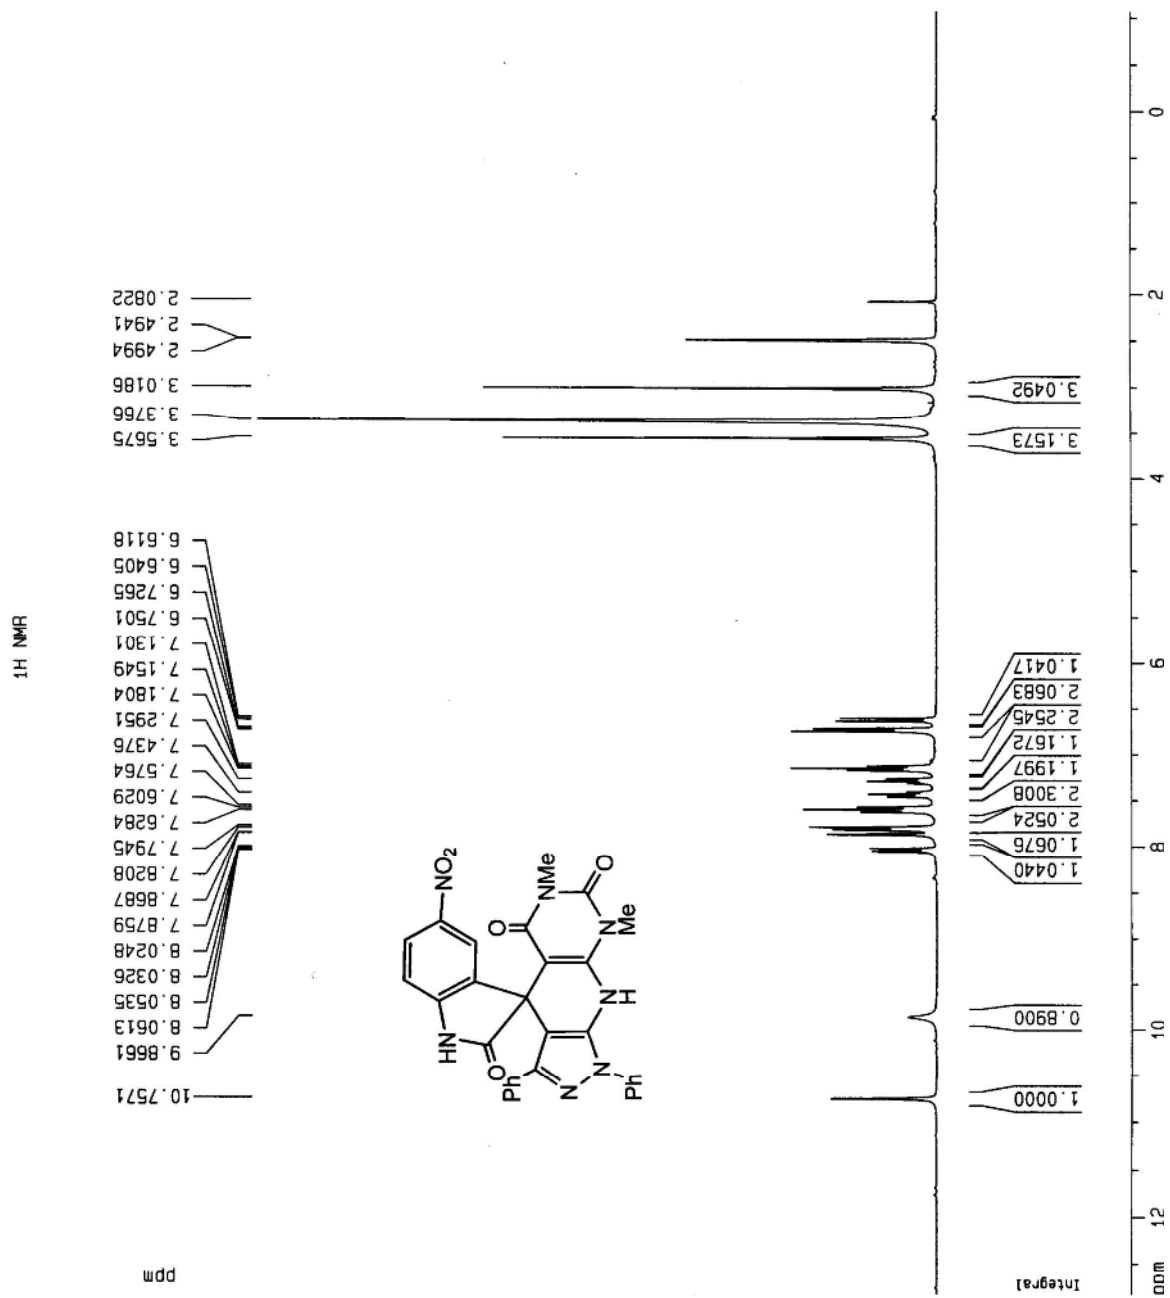

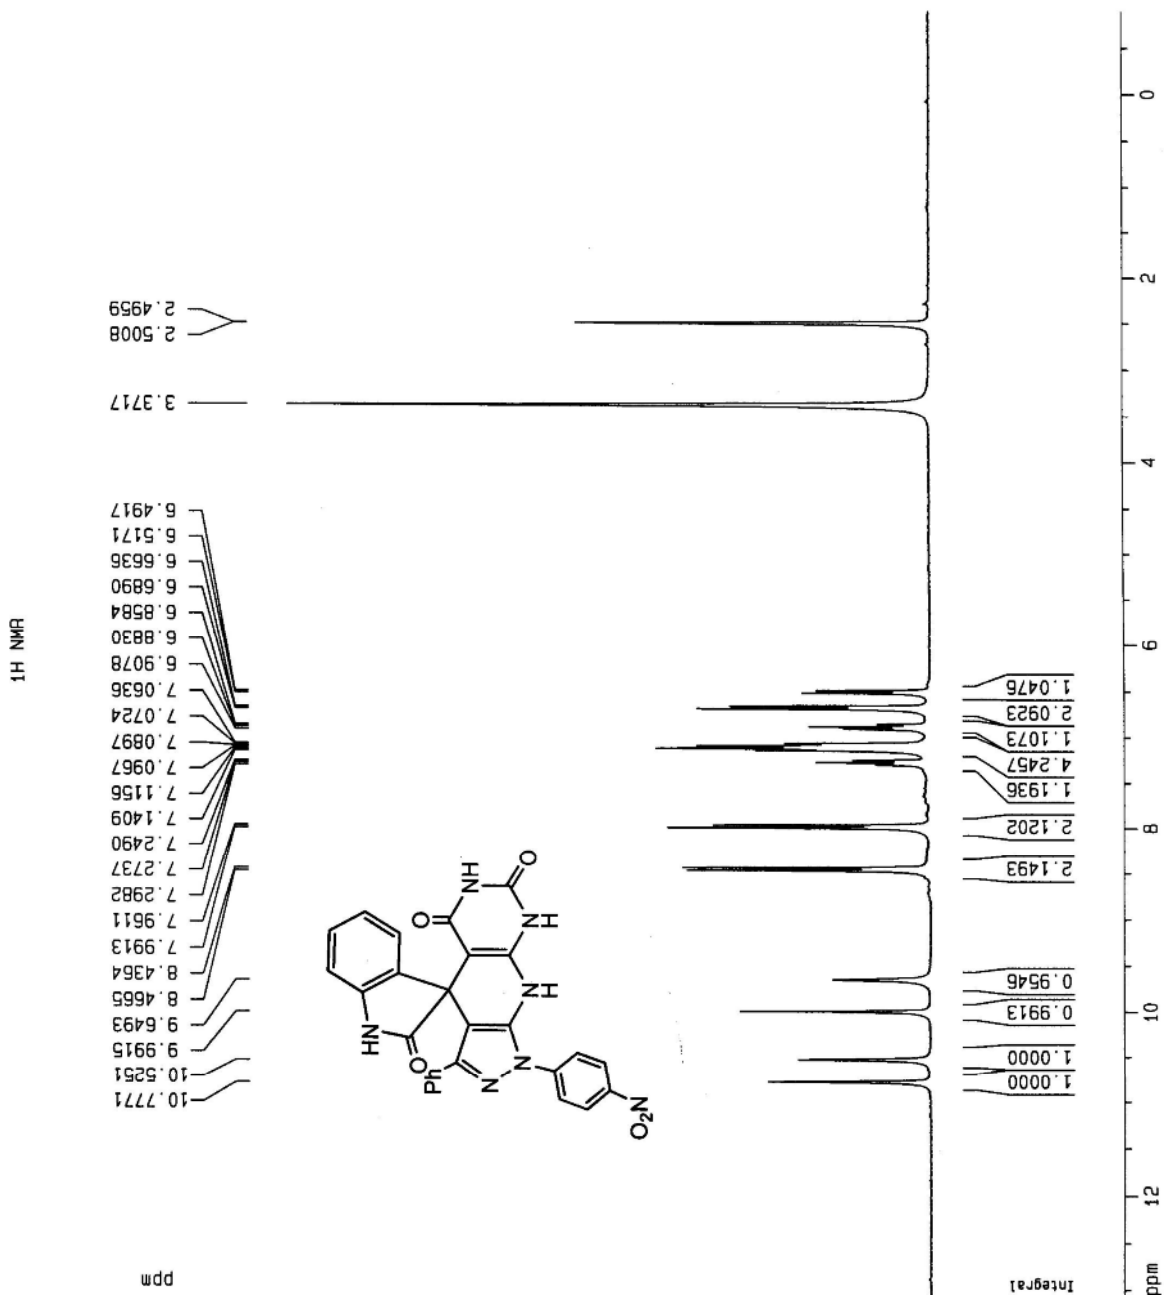

4n

4n

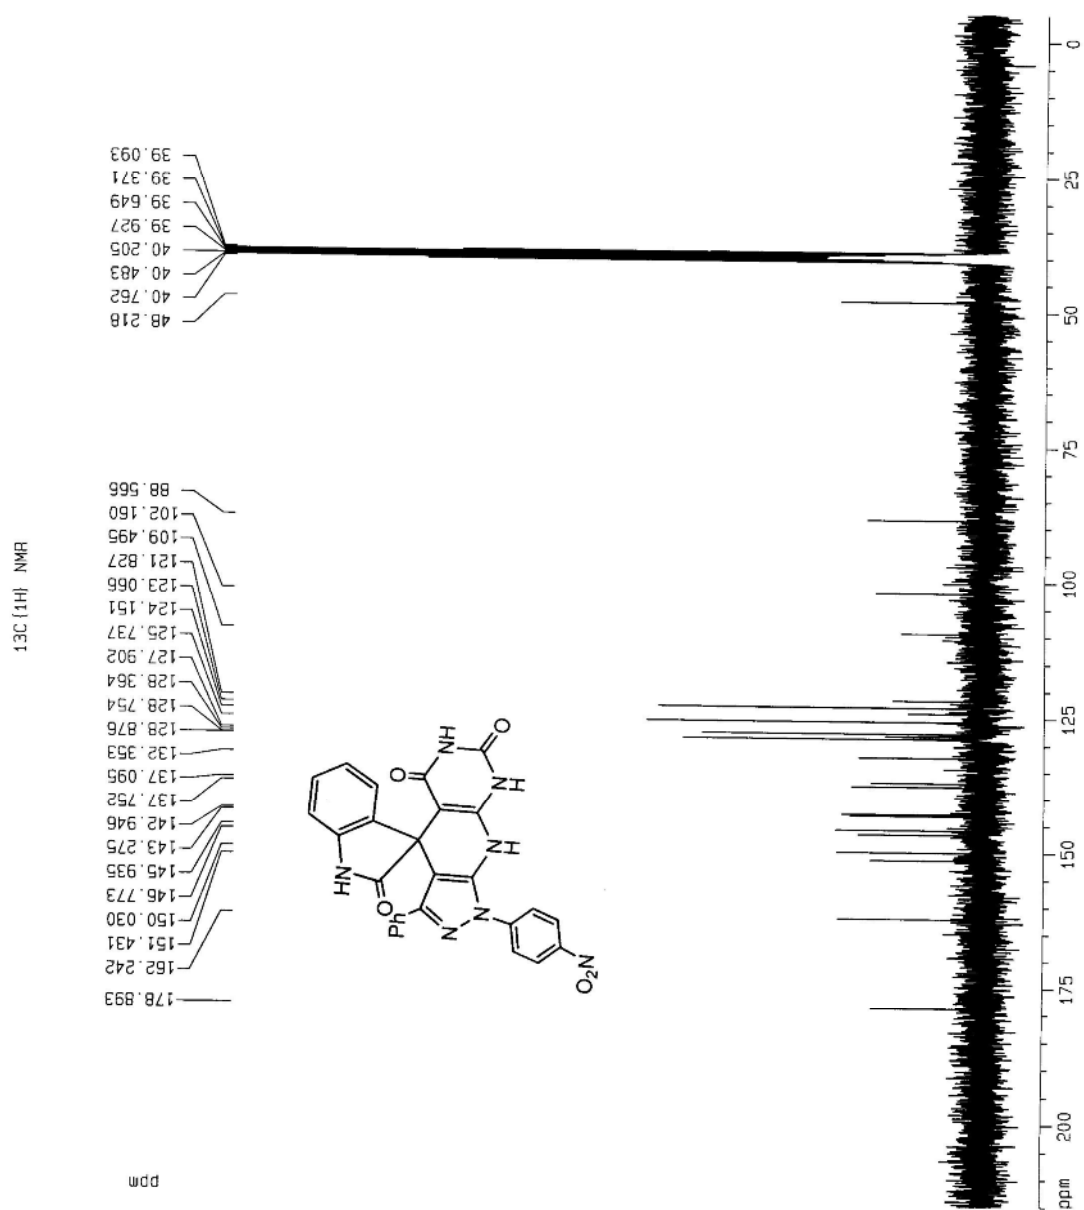

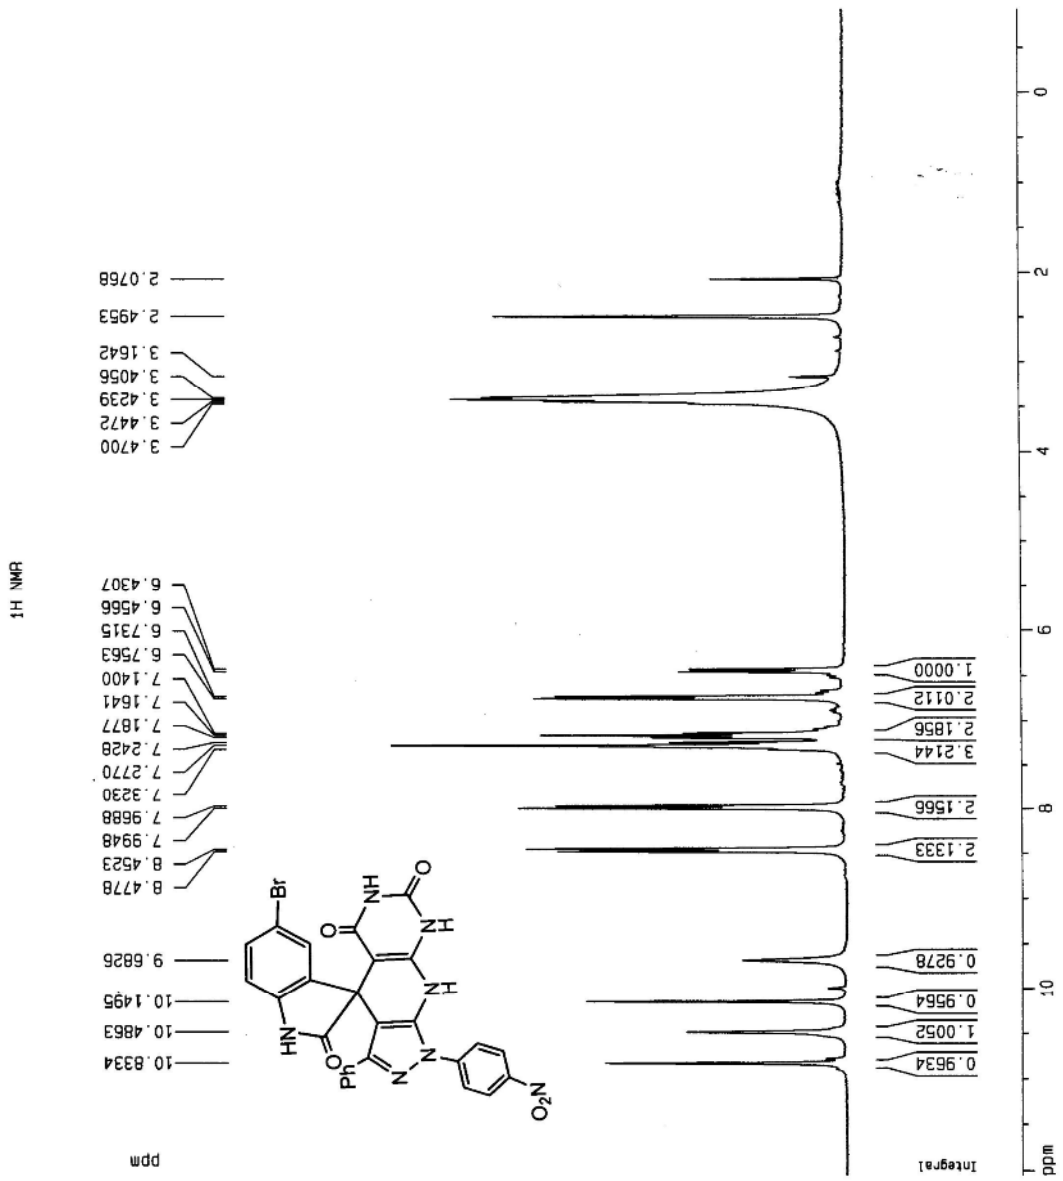

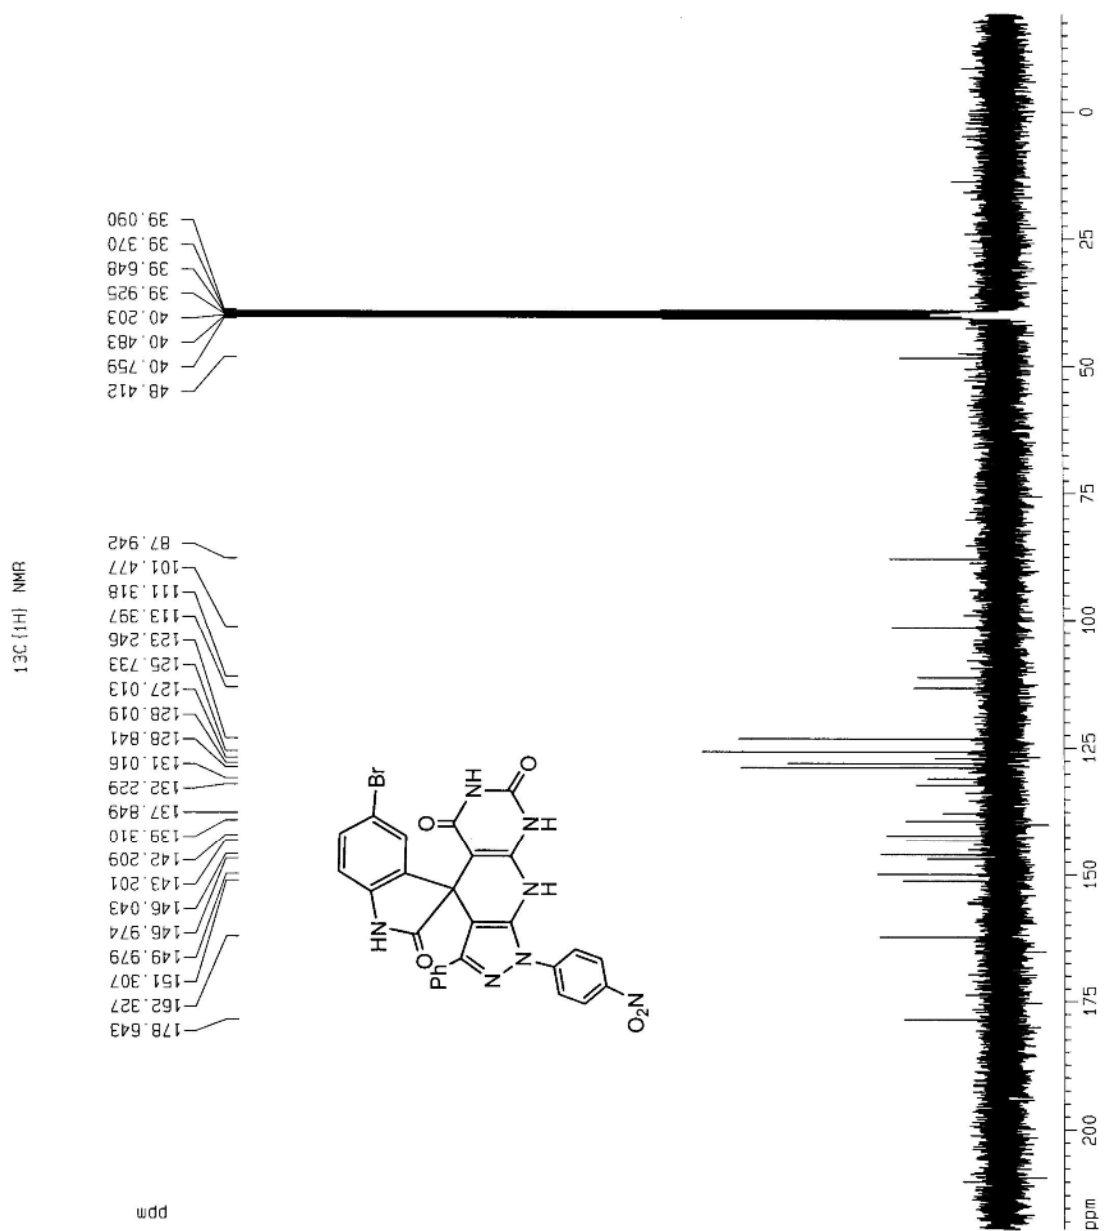

Supplement: c4dt02038c1.pdf [file c4dt02038c1.pdf]
